# Supplementary material for: A dinuclear [{(p-cym)RuIICl}2(μ-bpytz˙−)]+ complex bridged by a radical anion: synthesis, spectroelectrochemical, EPR and theoretical investigation (bpytz = 3,6-bis(3,5-dimethylpyrazolyl)1,2,4,5-tetrazine; p-cym = p-cymene)
Source: Royal Society of Chemistry journal article supplement (doi:10.1039/c6dt01995a), 2016-01-01

# Electronic Supplementary Information

**Dinuclear  $\{[(p\text{-cym})\text{Ru}^{\text{II}}\text{Cl}]_2(\mu\text{-bpytz}^{\bullet-})\}^+$  complex bridged by a radical anion: synthesis, spectroelectrochemical, EPR and theoretical investigation (bpytz = 3,6-bis(3,5-dimethylpyrazolyl)1,2,4,5-tetrazine; *p*-cym = *p*-cymene)**

Suman Kumar Tripathy,<sup>a</sup> Margarethe van der Meer,<sup>b</sup> Anupam Sahoo,<sup>a</sup> Paltan Laha,<sup>a</sup> Niranjan Dehury,<sup>a</sup> Sebastian Plebst,<sup>c</sup> Biprajit Sarkar,<sup>b\*</sup> Kousik Samanta,<sup>a\*</sup> and Srikanta Patra,<sup>a\*</sup>

<sup>a</sup>School of Basic Sciences, Indian Institute of Technology Bhubaneswar, Bhubaneswar - 751007, India. E-mail: srikanta@iitbbs.ac.in.; kousik@iitbbs.ac.in.

<sup>b</sup>Institut für Chemie und Biochemie, Freie Universität Berlin, Fabeckstraße 34-36, D-14195 Berlin, Germany. E-mail: Biprajit.sarkar@fu-berlin.de.

<sup>c</sup>Institut für Anorganische Chemie, Universität Stuttgart, Pfaffenwaldring 55, D-70569, Stuttgart, Germany.

**Fig. S1** Optimised structure of  $[1]^+$ .

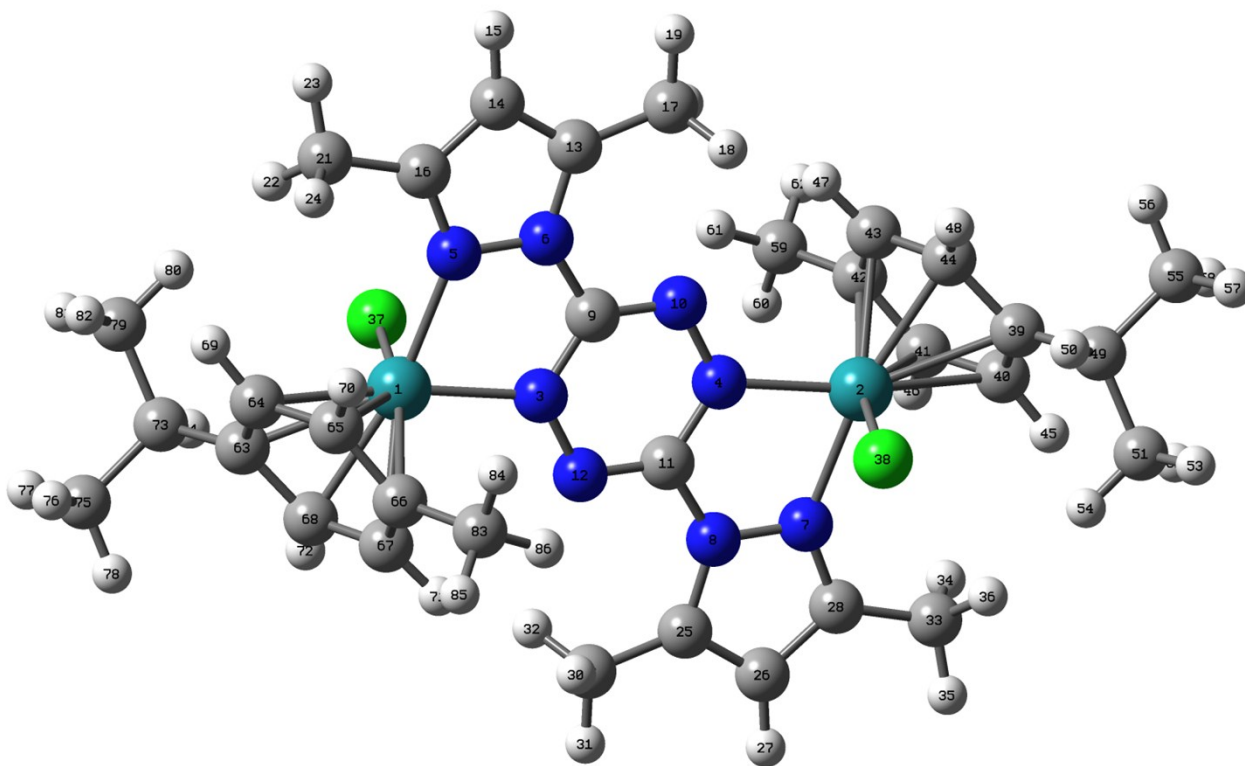

**Table S1.** Mulliken atomic spin densities for [1]<sup>+</sup>.

| Number | Symbol | Value   | Number | Symbol | Value   | Number | Symbol | Value   |
|--------|--------|---------|--------|--------|---------|--------|--------|---------|
| 1      | Ru     | 0.0185  | 41     | C      | -0.0030 | 81     | H      | 0.0000  |
| 2      | Ru     | 0.0185  | 42     | C      | 0.0133  | 82     | H      | 0.0000  |
| 3      | N      | 0.2976  | 43     | C      | -0.0038 | 83     | C      | -0.0008 |
| 4      | N      | 0.2976  | 44     | C      | 0.0013  | 84     | H      | 0.0001  |
| 5      | N      | 0.0027  | 45     | H      | 0.0000  | 85     | H      | 0.0006  |
| 6      | N      | 0.0020  | 46     | H      | 0.0002  | 86     | H      | -0.0001 |
| 7      | N      | 0.0027  | 47     | H      | 0.0000  |        |        |         |
| 8      | N      | 0.0020  | 48     | H      | 0.0001  |        |        |         |
| 9      | C      | -0.0845 | 49     | C      | 0.0001  |        |        |         |
| 10     | N      | 0.2666  | 50     | H      | -0.0001 |        |        |         |
| 11     | C      | -0.0845 | 51     | C      | 0.0000  |        |        |         |
| 12     | N      | 0.2666  | 52     | H      | 0.0000  |        |        |         |
| 13     | C      | -0.0054 | 53     | H      | 0.0000  |        |        |         |
| 14     | C      | -0.0020 | 54     | H      | 0.0000  |        |        |         |
| 15     | H      | 0.0002  | 55     | C      | -0.0001 |        |        |         |
| 16     | C      | -0.0084 | 56     | H      | 0.0000  |        |        |         |
| 17     | C      | 0.0007  | 57     | H      | -0.0001 |        |        |         |
| 18     | H      | 0.0000  | 58     | H      | 0.0000  |        |        |         |
| 19     | H      | -0.0002 | 59     | C      | -0.0008 |        |        |         |
| 20     | H      | -0.0002 | 60     | H      | 0.0001  |        |        |         |
| 21     | C      | 0.0008  | 61     | H      | -0.0001 |        |        |         |
| 22     | H      | -0.0004 | 62     | H      | 0.0006  |        |        |         |
| 23     | H      | 0.0000  | 63     | C      | -0.0026 |        |        |         |
| 24     | H      | -0.0005 | 64     | C      | 0.0012  |        |        |         |
| 25     | C      | -0.0054 | 65     | C      | -0.0030 |        |        |         |
| 26     | C      | -0.0020 | 66     | C      | 0.0133  |        |        |         |
| 27     | H      | 0.0002  | 67     | C      | -0.0038 |        |        |         |
| 28     | C      | -0.0084 | 68     | C      | 0.0013  |        |        |         |
| 29     | C      | 0.0007  | 69     | H      | 0.0000  |        |        |         |
| 30     | H      | -0.0002 | 70     | H      | 0.0002  |        |        |         |
| 31     | H      | -0.0002 | 71     | H      | 0.0000  |        |        |         |
| 32     | H      | 0.0000  | 72     | H      | 0.0001  |        |        |         |
| 33     | C      | 0.0008  | 73     | C      | 0.0001  |        |        |         |
| 34     | H      | -0.0005 | 74     | H      | -0.0001 |        |        |         |
| 35     | H      | 0.0000  | 75     | C      | -0.0001 |        |        |         |
| 36     | H      | -0.0004 | 76     | H      | 0.0000  |        |        |         |
| 37     | Cl     | 0.0063  | 77     | H      | -0.0001 |        |        |         |
| 38     | Cl     | 0.0063  | 78     | H      | 0.0000  |        |        |         |
| 39     | C      | -0.0026 | 79     | C      | 0.0000  |        |        |         |
| 40     | C      | 0.0012  | 80     | H      | 0.0000  |        |        |         |

**Table S2.** Calculated energies of Kohn-Sham molecular orbitals (MO) at the B3LYP Level and the contributions of various molecular groups to the MOs of [1]<sup>+</sup>.

| <b><math>\alpha</math> spin orbitals</b> |         |            |                                     |    |    |       | <b><math>\beta</math> spin orbitals</b> |         |            |                                     |    |    |       |
|------------------------------------------|---------|------------|-------------------------------------|----|----|-------|-----------------------------------------|---------|------------|-------------------------------------|----|----|-------|
| Sr. No.                                  | MO's    | Energy(eV) | Contribution of the group to MO (%) |    |    |       | Sr. No.                                 | MO's    | Energy(eV) | Contribution of the group to MO (%) |    |    |       |
|                                          |         |            | bpytz                               | Cl | Ru | p-cym |                                         |         |            | bpytz                               | Cl | Ru | p-cym |
| 189                                      | LUMO+10 | -1.79      | 77                                  | 0  | 20 | 3     |                                         |         |            |                                     |    |    |       |
| 188                                      | LUMO+9  | -2.85      | 27                                  | 2  | 14 | 57    | 188                                     | LUMO+10 | -2.79      | 44                                  | 1  | 13 | 42    |
| 187                                      | LUMO+8  | -2.89      | 3                                   | 1  | 21 | 75    | 187                                     | LUMO+9  | -2.86      | 4                                   | 1  | 22 | 74    |
| 186                                      | LUMO+7  | -2.93      | 6                                   | 0  | 24 | 69    | 186                                     | LUMO+8  | -2.9       | 8                                   | 0  | 25 | 67    |
| 185                                      | LUMO+6  | -2.98      | 4                                   | 1  | 20 | 75    | 185                                     | LUMO+7  | -2.97      | 4                                   | 1  | 21 | 74    |
| 184                                      | LUMO+5  | -3.21      | 68                                  | 0  | 7  | 25    | 184                                     | LUMO+6  | -3.11      | 49                                  | 1  | 10 | 40    |
| 183                                      | LUMO+4  | -3.73      | 16                                  | 0  | 53 | 32    | 183                                     | LUMO+5  | -3.66      | 22                                  | 0  | 48 | 30    |
| 182                                      | LUMO+3  | -3.75      | 16                                  | 0  | 51 | 32    | 182                                     | LUMO+4  | -3.71      | 17                                  | 0  | 49 | 34    |
| 181                                      | LUMO+2  | -4.01      | 17                                  | 13 | 47 | 23    | 181                                     | LUMO+3  | -3.98      | 25                                  | 11 | 44 | 20    |
| 180                                      | LUMO+1  | -4.05      | 6                                   | 16 | 50 | 28    | 180                                     | LUMO+2  | -4.03      | 6                                   | 16 | 50 | 29    |
| 179                                      | LUMO    | -4.23      | 84                                  | 3  | 6  | 7     | 179                                     | LUMO+1  | -4.15      | 76                                  | 4  | 10 | 9     |
| 178                                      | HOMO    | -7.21      | 77                                  | 2  | 15 | 5     | 178                                     | LUMO    | -4.85      | 83                                  | 2  | 8  | 7     |
| 177                                      | HOMO-1  | -8.14      | 6                                   | 42 | 39 | 13    | 177                                     | HOMO    | -8.11      | 7                                   | 38 | 41 | 14    |
| 176                                      | HOMO-2  | -8.18      | 6                                   | 44 | 38 | 12    | 176                                     | HOMO-1  | -8.17      | 5                                   | 44 | 38 | 13    |
| 175                                      | HOMO-3  | -8.33      | 11                                  | 35 | 46 | 8     | 175                                     | HOMO-2  | -8.26      | 13                                  | 31 | 47 | 9     |
| 174                                      | HOMO-4  | -8.51      | 13                                  | 58 | 25 | 4     | 174                                     | HOMO-3  | -8.41      | 9                                   | 48 | 37 | 6     |
| 173                                      | HOMO-5  | -8.89      | 15                                  | 49 | 23 | 12    | 173                                     | HOMO-4  | -8.85      | 20                                  | 52 | 18 | 10    |
| 172                                      | HOMO-6  | -8.96      | 23                                  | 33 | 30 | 13    | 172                                     | HOMO-5  | -8.93      | 18                                  | 38 | 30 | 13    |
| 171                                      | HOMO-7  | -9.26      | 69                                  | 20 | 9  | 1     | 171                                     | HOMO-6  | -9.09      | 77                                  | 13 | 7  | 2     |
| 170                                      | HOMO-8  | -9.37      | 32                                  | 14 | 50 | 5     | 170                                     | HOMO-7  | -9.35      | 34                                  | 18 | 44 | 5     |
| 169                                      | HOMO-9  | -9.41      | 39                                  | 8  | 48 | 5     | 169                                     | HOMO-8  | -9.36      | 33                                  | 16 | 46 | 5     |

|     |         |        |    |    |    |    |  |     |         |       |    |    |    |   |
|-----|---------|--------|----|----|----|----|--|-----|---------|-------|----|----|----|---|
| 168 | HOMO-10 | -9.68  | 33 | 32 | 27 | 8  |  | 168 | HOMO-9  | -9.58 | 31 | 31 | 31 | 7 |
| 167 | HOMO-11 | -9.9   | 21 | 31 | 39 | 10 |  | 167 | HOMO-10 | -9.8  | 18 | 33 | 41 | 8 |
| 166 | HOMO-12 | -10.07 | 70 | 11 | 13 | 6  |  |     |         |       |    |    |    |   |
| 165 | HOMO-13 | -10.12 | 63 | 1  | 16 | 20 |  |     |         |       |    |    |    |   |

**Table S3.** Various bond lengths (Å) in optimised [1]<sup>+</sup>.

| <b>Definition*</b> | <b>Value</b> | <b>Definition*</b> | <b>Value</b> | <b>Definition*</b> | <b>Value</b> |
|--------------------|--------------|--------------------|--------------|--------------------|--------------|
| R (1,3)            | 2.0669       | R (21,22)          | 1.0941       | R (63,73)          | 1.5170       |
| R (1,5)            | 2.1108       | R (21,23)          | 1.0927       | R (64,65)          | 1.4353       |
| R (1,37)           | 2.4326       | R (21,24)          | 1.0963       | R (64,69)          | 1.0823       |
| R (1,63)           | 2.3494       | R (25,26)          | 1.3777       | R (65,66)          | 1.4136       |
| R (1,64)           | 2.3233       | R (25,29)          | 1.4926       | R (65,70)          | 1.0857       |
| R (1,65)           | 2.2645       | R (26,27)          | 1.0803       | R (66,67)          | 1.4348       |
| R (1,66)           | 2.3045       | R (26,28)          | 1.4138       | R (66,83)          | 1.5046       |
| R (1,67)           | 2.2405       | R (28,33)          | 1.4947       | R (67,68)          | 1.4078       |
| R (1,68)           | 2.2537       | R (29,30)          | 1.0947       | R (67,71)          | 1.0844       |
| R (2,4)            | 2.0669       | R (29,31)          | 1.0929       | R (68,72)          | 1.0840       |
| R (2,7)            | 2.1108       | R (29,32)          | 1.0937       | R (73,74)          | 1.0967       |
| R (2,38)           | 2.4326       | R (33,34)          | 1.0963       | R (73,75)          | 1.5460       |
| R (2,39)           | 2.3494       | R (33,35)          | 1.0927       | R (73,79)          | 1.5331       |
| R (2,40)           | 2.3233       | R (33,36)          | 1.0941       | R (75,76)          | 1.0963       |
| R (2,41)           | 2.2645       | R (39,40)          | 1.4060       | R (75,77)          | 1.0949       |
| R (2,42)           | 2.3045       | R (39,44)          | 1.4410       | R (75,78)          | 1.0957       |
| R (2,43)           | 2.2405       | R (39,49)          | 1.5170       | R (79,80)          | 1.0945       |
| R (2,44)           | 2.2537       | R (40,41)          | 1.4353       | R (79,81)          | 1.0945       |
| R (3,9)            | 1.3465       | R (40,45)          | 1.0823       | R (79,82)          | 1.0971       |
| R (3,12)           | 1.3690       | R (41,42)          | 1.4136       | R (83,84)          | 1.0937       |
| R (4,10)           | 1.3690       | R (41,46)          | 1.0857       | R (83,85)          | 1.0974       |
| R (4,11)           | 1.3465       | R (42,43)          | 1.4348       | R (83,86)          | 1.0943       |
| R (5,6)            | 1.3749       | R (42,59)          | 1.5046       |                    |              |
| R (5,16)           | 1.3324       | R (43,44)          | 1.4078       |                    |              |
| R (6,9)            | 1.3981       | R (43,47)          | 1.0844       |                    |              |
| R (6,13)           | 1.3778       | R (44,48)          | 1.0840       |                    |              |
| R (7,8)            | 1.3749       | R (49,50)          | 1.0967       |                    |              |
| R (7,28)           | 1.3324       | R (49,51)          | 1.5331       |                    |              |
| R (8,11)           | 1.3981       | R (49,55)          | 1.5460       |                    |              |
| R (8,25)           | 1.3778       | R (51,52)          | 1.0971       |                    |              |
| R (9,10)           | 1.3166       | R (51,53)          | 1.0945       |                    |              |
| R (11,12)          | 1.3166       | R (51,54)          | 1.0945       |                    |              |
| R (13,14)          | 1.3777       | R (55,56)          | 1.0957       |                    |              |
| R (13,17)          | 1.4926       | R (55,57)          | 1.0949       |                    |              |
| R (14,15)          | 1.0803       | R (55,58)          | 1.0963       |                    |              |
| R (14,16)          | 1.4138       | R (59,60)          | 1.0937       |                    |              |
| R (16,21)          | 1.4947       | R (59,61)          | 1.0943       |                    |              |
| R (17,18)          | 1.0937       | R (59,62)          | 1.0974       |                    |              |
| R (17,19)          | 1.0929       | R (63,64)          | 1.4060       |                    |              |
| R (17,20)          | 1.0947       | R (63,68)          | 1.4410       |                    |              |

\* For the atomic indices refer to Figure S1

**Table S4** Various bond angles (°) in optimised [1]<sup>+</sup>.

| Definition* | Value          |
|-------------|--------|-------------|--------|-------------|--------|-------------|--------|-------------|--------|-------------|----------------|
| A(3,1,5)    | 75.74  | A(7,2,40)   | 105.45 | A(6,9,10)   | 119.01 | A(30,29,32) | 107.50 | A(49,51,54) | 110.98 | A(63,73,74) | 106.11         |
| A(3,1,37)   | 84.31  | A(7,2,41)   | 98.31  | A(4,10,9)   | 114.85 | A(31,29,32) | 109.10 | A(52,51,53) | 106.99 | A(63,73,75) | 108.79         |
| A(3,1,63)   | 151.34 | A(7,2,42)   | 116.18 | A(4,11,8)   | 113.96 | A(28,33,34) | 111.50 | A(52,51,54) | 109.38 | A(63,73,79) | 114.47         |
| A(3,1,64)   | 163.31 | A(7,2,43)   | 150.43 | A(4,11,12)  | 127.03 | A(28,33,35) | 110.00 | A(53,51,54) | 107.71 | A(74,73,75) | 108.33         |
| A(3,1,65)   | 127.02 | A(7,2,44)   | 168.04 | A(8,11,12)  | 119.01 | A(28,33,36) | 110.80 | A(49,55,56) | 112.00 | A(74,73,79) | 107.46         |
| A(3,1,66)   | 99.07  | A(38,2,39)  | 89.87  | A(3,12,11)  | 114.85 | A(34,33,35) | 107.70 | A(49,55,57) | 109.74 | A(75,73,79) | 111.37         |
| A(3,1,67)   | 94.57  | A(38,2,40)  | 112.37 | A(6,13,14)  | 105.55 | A(34,33,36) | 108.30 | A(49,55,58) | 111.12 | A(73,75,76) | 111.12         |
| A(3,1,68)   | 115.97 | A(38,2,41)  | 148.36 | A(6,13,17)  | 125.26 | A(35,33,36) | 108.40 | A(56,55,57) | 107.86 | A(73,75,77) | 109.74         |
| A(5,1,37)   | 84.24  | A(38,2,42)  | 159.54 | A(14,13,17) | 129.19 | A(2,39,49)  | 130.50 | A(56,55,58) | 108.01 | A(73,75,78) | 112.00         |
| A(5,1,63)   | 131.64 | A(38,2,43)  | 123.12 | A(13,14,15) | 126.07 | A(40,39,44) | 117.20 | A(57,55,58) | 107.97 | A(76,75,77) | 107.97         |
| A(5,1,64)   | 105.45 | A(38,2,44)  | 94.25  | A(13,14,16) | 107.45 | A(40,39,49) | 123.80 | A(42,59,60) | 111.41 | A(76,75,78) | 108.01         |
| A(5,1,65)   | 98.31  | A(39,2,41)  | 64.81  | A(15,14,16) | 126.48 | A(44,39,49) | 118.90 | A(42,59,61) | 111.26 | A(77,75,78) | 107.86         |
| A(5,1,66)   | 116.18 | A(39,2,42)  | 77.46  | A(5,16,14)  | 109.34 | A(2,40,45)  | 127.20 | A(42,59,62) | 110.13 | A(73,79,80) | 110.98         |
| A(5,1,67)   | 150.43 | A(39,2,43)  | 65.43  | A(5,16,21)  | 122.95 | A(39,40,41) | 121.10 | A(60,59,61) | 108.37 | A(73,79,81) | 109.40         |
| A(5,1,68)   | 168.04 | A(40,2,42)  | 65.17  | A(14,16,21) | 127.71 | A(39,40,45) | 119.90 | A(60,59,62) | 107.79 | A(73,79,82) | 112.21         |
| A(37,1,63)  | 89.87  | A(40,2,43)  | 76.17  | A(13,17,18) | 111.68 | A(41,40,45) | 118.90 | A(61,59,62) | 107.74 | A(80,79,81) | 107.71         |
| A(37,1,64)  | 112.37 | A(40,2,44)  | 64.13  | A(13,17,19) | 108.72 | A(2,41,46)  | 125.30 | A(1,63,73)  | 130.54 | A(80,79,82) | 109.38         |
| A(37,1,65)  | 148.36 | A(41,2,43)  | 65.00  | A(13,17,20) | 111.20 | A(40,41,42) | 122.10 | A(64,63,68) | 117.24 | A(81,79,82) | 106.99         |
| A(37,1,66)  | 159.54 | A(41,2,44)  | 76.80  | A(18,17,19) | 109.12 | A(40,41,46) | 118.90 | A(64,63,73) | 123.83 | A(66,83,84) | 111.41         |
| A(37,1,67)  | 123.12 | A(42,2,44)  | 66.04  | A(18,17,20) | 107.48 | A(42,41,46) | 119.00 | A(68,63,73) | 118.92 | A(66,83,85) | 110.13         |
| A(37,1,68)  | 94.25  | A(1,3,9)    | 118.35 | A(19,17,20) | 108.57 | A(2,42,59)  | 129.30 | A(1,64,69)  | 127.20 | A(66,83,86) | 111.26         |
| A(63,1,65)  | 64.81  | A(1,3,12)   | 122.90 | A(16,21,22) | 110.84 | A(41,42,43) | 116.40 | A(63,64,65) | 121.06 | A(84,83,85) | 107.79         |
| A(63,1,66)  | 77.46  | A(9,3,12)   | 118.13 | A(16,21,23) | 109.96 | A(41,42,59) | 122.40 | A(63,64,69) | 119.94 | A(84,83,86) | 108.37         |
| A(63,1,67)  | 65.43  | A(2,4,10)   | 122.90 | A(16,21,24) | 111.54 | A(43,42,59) | 121.20 | A(65,64,69) | 118.92 | A(85,83,86) | 107.74         |
| A(64,1,66)  | 65.17  | A(2,4,11)   | 118.35 | A(22,21,23) | 108.36 | A(2,43,47)  | 122.20 | A(1,65,70)  | 125.34 |             | <i>Cont...</i> |
| A(64,1,67)  | 76.17  | A(10,4,11)  | 118.13 | A(22,21,24) | 108.32 | A(42,43,44) | 121.80 | A(64,65,66) | 122.06 |             |                |

|            |        |            |        |             |        |             |        |             |        |  |  |
|------------|--------|------------|--------|-------------|--------|-------------|--------|-------------|--------|--|--|
| A(64,1,68) | 64.13  | A(1,5,6)   | 114.36 | A(23,21,24) | 107.70 | A(42,43,47) | 118.90 | A(64,65,70) | 118.95 |  |  |
| A(65,1,67) | 65.00  | A(1,5,16)  | 138.70 | A(8,25,26)  | 105.55 | A(44,43,47) | 119.10 | A(66,65,70) | 118.99 |  |  |
| A(65,1,68) | 76.80  | A(6,5,16)  | 106.62 | A(8,25,29)  | 125.26 | A(2,44,48)  | 123.50 | A(1,66,83)  | 129.29 |  |  |
| A(66,1,68) | 66.04  | A(5,6,9)   | 116.75 | A(26,25,29) | 129.19 | A(39,44,43) | 121.20 | A(65,66,67) | 116.37 |  |  |
| A(4,2,7)   | 75.74  | A(5,6,13)  | 111.03 | A(25,26,27) | 126.07 | A(39,44,48) | 119.10 | A(65,66,83) | 122.40 |  |  |
| A(4,2,38)  | 84.31  | A(9,6,13)  | 132.20 | A(25,26,28) | 107.45 | A(43,44,48) | 119.60 | A(67,66,83) | 121.21 |  |  |
| A(4,2,39)  | 151.34 | A(2,7,8)   | 114.36 | A(27,26,28) | 126.48 | A(39,49,50) | 106.10 | A(1,67,71)  | 122.23 |  |  |
| A(4,2,40)  | 163.31 | A(2,7,28)  | 138.70 | A(7,28,26)  | 109.34 | A(39,49,51) | 114.50 | A(66,67,68) | 121.83 |  |  |
| A(4,2,41)  | 127.02 | A(8,7,28)  | 106.62 | A(7,28,33)  | 122.95 | A(39,49,55) | 108.80 | A(66,67,71) | 118.92 |  |  |
| A(4,2,42)  | 99.07  | A(7,8,11)  | 116.75 | A(26,28,33) | 127.71 | A(50,49,51) | 107.50 | A(68,67,71) | 119.06 |  |  |
| A(4,2,43)  | 94.57  | A(7,8,25)  | 111.03 | A(25,29,30) | 111.20 | A(50,49,55) | 108.30 | A(1,68,72)  | 123.52 |  |  |
| A(4,2,44)  | 115.97 | A(11,8,25) | 132.20 | A(25,29,31) | 108.72 | A(51,49,55) | 111.40 | A(63,68,67) | 121.24 |  |  |
| A(7,2,38)  | 84.24  | A(3,9,6)   | 113.96 | A(25,29,32) | 111.68 | A(49,51,52) | 112.20 | A(63,68,72) | 119.12 |  |  |
| A(7,2,39)  | 131.64 | A(3,9,10)  | 127.03 | A(30,29,31) | 108.57 | A(49,51,53) | 109.40 | A(67,68,72) | 119.59 |  |  |

\* For the atomic indices refer to Figure S1



**Table S5.** Various dihedral angles (°) in optimised [1]<sup>+</sup>.

| Definition*  | Value  | Definition*   | Value  | Definition*   | Value  | Definition*    | Value  | Definition*    | Value  | Definition*    | Value  |
|--------------|--------|---------------|--------|---------------|--------|----------------|--------|----------------|--------|----------------|--------|
| D(5,1,3,9)   | -8.5   | D(37,1,64,69) | -61.7  | D(43,2,4,10)  | -29.1  | D(44,39,49,55) | -79.4  | D(50,49,55,58) | 179.7  | D(67,66,83,85) | -82.8  |
| D(5,1,3,12)  | -179.0 | D(66,1,64,69) | 140.5  | D(43,2,4,11)  | 160.2  | D(39,40,41,42) | 3.5    | D(51,49,55,56) | -177.4 | D(67,66,83,86) | 36.6   |
| D(37,1,3,9)  | 77.0   | D(67,1,64,69) | 177.9  | D(44,2,4,10)  | 1.8    | D(39,40,41,46) | -177.0 | D(51,49,55,57) | -57.6  | D(66,67,68,63) | -1.4   |
| D(37,1,3,12) | -93.8  | D(68,1,64,69) | -145.3 | D(44,2,4,11)  | -168.9 | D(45,40,41,42) | -180.0 | D(51,49,55,58) | 61.7   | D(66,67,68,72) | 176.0  |
| D(63,1,3,9)  | 156.2  | D(3,1,65,70)  | 68.7   | D(4,2,7,8)    | -6.1   | D(45,40,41,46) | 0.1    | D(68,63,64,65) | -0.7   | D(71,67,68,63) | -176.4 |
| D(63,1,3,12) | -14.6  | D(5,1,65,70)  | -9.7   | D(4,2,7,28)   | -178.5 | D(40,41,42,43) | -5.0   | D(68,63,64,69) | 176.0  | D(71,67,68,72) | 1.0    |
| D(64,1,3,9)  | -105.0 | D(37,1,65,70) | -102.2 | D(38,2,7,8)   | 79.5   | D(40,41,42,59) | 176.8  | D(73,63,64,65) | -179.8 | D(63,73,75,76) | 65.4   |
| D(64,1,3,12) | 84.5   | D(63,1,65,70) | -142.0 | D(38,2,7,28)  | -92.9  | D(46,41,42,43) | 175.1  | D(73,63,64,69) | -3.1   | D(63,73,75,77) | -175.3 |
| D(65,1,3,9)  | -98.2  | D(67,1,65,70) | 144.7  | D(39,2,7,8)   | 164.1  | D(46,41,42,59) | -3.1   | D(64,63,68,67) | 3.1    | D(63,73,75,78) | -55.5  |
| D(65,1,3,12) | 91.0   | D(68,1,65,70) | -178.6 | D(39,2,7,28)  | -8.2   | D(41,42,43,44) | 2.6    | D(64,63,68,72) | -174.3 | D(74,73,75,76) | -179.7 |
| D(66,1,3,9)  | -123.0 | D(3,1,66,83)  | 28.4   | D(40,2,7,8)   | -168.9 | D(41,42,43,47) | -172.0 | D(73,63,68,67) | -177.8 | D(74,73,75,77) | -60.4  |
| D(66,1,3,12) | 65.9   | D(5,1,66,83)  | -50.1  | D(40,2,7,28)  | 18.7   | D(59,42,43,44) | -179.0 | D(73,63,68,72) | 4.8    | D(74,73,75,78) | 59.4   |
| D(67,1,3,9)  | -160.0 | D(37,1,66,83) | 126.5  | D(41,2,7,8)   | -132.3 | D(59,42,43,47) | 5.8    | D(1,63,73,74)  | 48.1   | D(79,73,75,76) | -61.7  |
| D(67,1,3,12) | 29.1   | D(63,1,66,83) | 179.5  | D(41,2,7,28)  | 55.3   | D(2,42,59,60)  | -70.0  | D(1,63,73,75)  | 164.5  | D(79,73,75,77) | 57.6   |
| D(68,1,3,9)  | 168.9  | D(64,1,66,83) | -145.8 | D(42,2,7,8)   | -99.4  | D(2,42,59,61)  | 51.1   | D(1,63,73,79)  | -70.2  | D(79,73,75,78) | 177.4  |
| D(68,1,3,12) | -1.8   | D(68,1,66,83) | 142.9  | D(42,2,7,28)  | 88.3   | D(2,42,59,62)  | 170.4  | D(64,63,73,74) | 142.2  | D(63,73,79,80) | 57.3   |
| D(3,1,5,6)   | 6.1    | D(3,1,67,71)  | -15.4  | D(43,2,7,8)   | -79.8  | D(41,42,59,60) | 20.4   | D(64,63,73,75) | -101.5 | D(63,73,79,81) | 176.0  |
| D(3,1,5,16)  | 178.5  | D(5,1,67,71)  | -84.4  | D(43,2,7,28)  | 107.8  | D(41,42,59,61) | 141.5  | D(64,63,73,79) | 23.8   | D(63,73,79,82) | -65.4  |
| D(37,1,5,6)  | -79.5  | D(37,1,67,71) | 70.8   | D(44,2,7,8)   | 162.8  | D(41,42,59,62) | -99.2  | D(68,63,73,74) | -36.9  | D(74,73,79,80) | -60.3  |
| D(37,1,5,16) | 92.9   | D(63,1,67,71) | 143.2  | D(44,2,7,28)  | -9.6   | D(43,42,59,60) | -158.0 | D(68,63,73,75) | 79.4   | D(74,73,79,81) | 58.4   |
| D(63,1,5,6)  | -164.0 | D(64,1,67,71) | 178.7  | D(4,2,39,49)  | 90.5   | D(43,42,59,61) | -36.6  | D(68,63,73,79) | -155.3 | D(74,73,79,82) | 177.0  |
| D(63,1,5,16) | 8.2    | D(65,1,67,71) | -144.4 | D(7,2,39,49)  | -69.5  | D(43,42,59,62) | 82.8   | D(63,64,65,66) | -3.5   | D(75,73,79,80) | -178.8 |
| D(64,1,5,6)  | 168.9  | D(3,1,68,72)  | -54.2  | D(38,2,39,49) | 12.7   | D(42,43,44,39) | 1.4    | D(63,64,65,70) | 176.6  | D(75,73,79,81) | -60.1  |
| D(64,1,5,16) | -18.7  | D(5,1,68,72)  | 113.8  | D(41,2,39,49) | -147.7 | D(42,43,44,48) | -176.0 | D(69,64,65,66) | 179.8  | D(75,73,79,82) | 58.5   |
| D(65,1,5,6)  | 132.3  | D(37,1,68,72) | 31.5   | D(42,2,39,49) | 176.5  | D(47,43,44,39) | 176.4  | D(69,64,65,70) | -0.1   | D(27,26,28,7)  | 179.4  |
| D(65,1,5,16) | -55.3  | D(64,1,68,72) | 144.4  | D(43,2,39,49) | 139.7  | D(47,43,44,48) | -1.0   | D(64,65,66,67) | 5.0    | D(27,26,28,33) | -1.0   |

|               |        |               |        |                |        |                |        |                |        |                |        |
|---------------|--------|---------------|--------|----------------|--------|----------------|--------|----------------|--------|----------------|--------|
| D(66,1,5,6)   | 99.4   | D(65,1,68,72) | -179.2 | D(4,2,40,45)   | -120.2 | D(39,49,51,52) | 65.4   | D(64,65,66,83) | -176.8 | D(7,28,33,34)  | -69.5  |
| D(66,1,5,16)  | -88.3  | D(66,1,68,72) | -142.8 | D(7,2,40,45)   | -28.4  | D(39,49,51,53) | -176.0 | D(70,65,66,67) | -175.1 | D(7,28,33,35)  | 171.1  |
| D(67,1,5,6)   | 79.8   | D(7,2,4,10)   | 179.3  | D(38,2,40,45)  | 61.7   | D(39,49,51,54) | -57.3  | D(70,65,66,83) | 3.1    | D(7,28,33,36)  | 51.3   |
| D(67,1,5,16)  | -108.0 | D(7,2,4,11)   | 8.5    | D(42,2,40,45)  | -140.5 | D(50,49,51,52) | -177.0 | D(65,66,67,68) | -2.6   | D(26,28,33,34) | 111.0  |
| D(68,1,5,6)   | -163.0 | D(38,2,4,10)  | 93.8   | D(43,2,40,45)  | -177.9 | D(50,49,51,53) | -58.4  | D(65,66,67,71) | 172.4  | D(26,28,33,35) | -8.4   |
| D(68,1,5,16)  | 9.6    | D(38,2,4,11)  | -77.0  | D(44,2,40,45)  | 145.3  | D(50,49,51,54) | 60.3   | D(83,66,67,68) | 179.2  | D(26,28,33,36) | -128.2 |
| D(3,1,63,73)  | -90.5  | D(39,2,4,10)  | 14.6   | D(4,2,41,46)   | -68.7  | D(55,49,51,52) | -58.5  | D(83,66,67,71) | -5.8   | D(44,39,40,41) | 0.7    |
| D(5,1,63,73)  | 69.5   | D(39,2,4,11)  | -156.2 | D(7,2,41,46)   | 9.7    | D(55,49,51,53) | 60.1   | D(1,66,83,84)  | 70.0   | D(44,39,40,45) | -176.0 |
| D(37,1,63,73) | -12.7  | D(40,2,4,10)  | -84.5  | D(38,2,41,46)  | 102.2  | D(55,49,51,54) | 178.8  | D(1,66,83,85)  | -170.4 | D(49,39,40,41) | 179.8  |
| D(65,1,63,73) | 147.7  | D(40,2,4,11)  | 104.8  | D(39,2,41,46)  | 142.0  | D(39,49,55,56) | 55.5   | D(1,66,83,86)  | -51.1  | D(49,39,40,45) | 3.1    |
| D(66,1,63,73) | -177.0 | D(41,2,4,10)  | -91.0  | D(43,2,41,46)  | -144.7 | D(39,49,55,57) | 175.3  | D(65,66,83,84) | -20.4  | D(40,39,44,43) | -3.1   |
| D(67,1,63,73) | -140.0 | D(41,2,4,11)  | 98.2   | D(44,2,41,46)  | 178.6  | D(39,49,55,58) | -65.4  | D(65,66,83,85) | 99.2   | D(40,39,44,48) | 174.3  |
| D(3,1,64,69)  | 120.2  | D(42,2,4,10)  | -65.9  | D(4,2,42,59)   | -28.4  | D(50,49,55,56) | -59.4  | D(65,66,83,86) | -141.5 | D(49,39,44,43) | 177.8  |
| D(5,1,64,69)  | 28.4   | D(42,2,4,11)  | 123.4  | D(7,2,42,59)   | 50.1   | D(50,49,55,57) | 60.4   | D(67,66,83,84) | 157.7  | D(49,39,44,48) | -4.8   |
| D(1,3,9,6)    | 9.3    | D(1,3,12,11)  | 170.9  | D(12,3,9,10)   | -0.2   | D(17,13,14,15) | 0.0    | D(10,4,11,8)   | 179.5  | D(2,39,49,50)  | -48.1  |
| D(38,2,42,59) | -127.0 | D(5,6,13,14)  | -0.3   | D(5,16,21,24)  | 69.5   | D(17,13,14,16) | -180.0 | D(10,4,11,12)  | 0.2    | D(2,39,49,51)  | 70.2   |
| D(39,2,42,59) | -179.0 | D(5,6,13,17)  | 179.5  | D(14,16,21,22) | 128.2  | D(6,13,17,18)  | -54.8  | D(1,5,6,9)     | -3.4   | D(2,39,49,55)  | -164.5 |
| D(40,2,42,59) | 145.8  | D(9,6,13,14)  | 178.3  | D(14,16,21,23) | 8.4    | D(6,13,17,19)  | -175.2 | D(1,5,6,13)    | 175.4  | D(40,39,49,50) | -142.1 |
| D(44,2,42,59) | -143.0 | D(9,6,13,17)  | -1.8   | D(14,16,21,24) | -111.0 | D(6,13,17,20)  | 65.3   | D(16,5,6,9)    | -178.0 | D(40,39,49,51) | -23.8  |
| D(4,2,43,47)  | 15.4   | D(2,7,8,11)   | 3.4    | D(8,25,26,27)  | -179.8 | D(14,13,17,18) | 125.1  | D(16,5,6,13)   | 0.7    | D(40,39,49,55) | 101.5  |
| D(7,2,43,47)  | 84.4   | D(2,7,8,25)   | -175.4 | D(8,25,26,28)  | 0.1    | D(14,13,17,19) | 4.6    | D(1,5,16,14)   | -174.0 | D(44,39,49,50) | 36.9   |
| D(38,2,43,47) | -70.8  | D(28,7,8,11)  | 178.2  | D(29,25,26,27) | 0.0    | D(14,13,17,20) | -114.9 | D(1,5,16,21)   | 6.1    | D(44,39,49,51) | 155.3  |
| D(39,2,43,47) | -143.0 | D(28,7,8,25)  | -0.7   | D(29,25,26,28) | 180.0  | D(13,14,16,5)  | 0.6    | D(6,5,16,14)   | -0.8   | D(7,8,25,26)   | 0.3    |
| D(40,2,43,47) | -179.0 | D(2,7,28,26)  | 173.5  | D(8,25,29,30)  | -65.3  | D(13,14,16,21) | -179.0 | D(6,5,16,21)   | 178.8  | D(7,8,25,29)   | -179.5 |
| D(41,2,43,47) | 144.4  | D(2,7,28,33)  | -6.1   | D(8,25,29,31)  | 175.2  | D(15,14,16,5)  | -179.4 | D(5,6,9,3)     | -3.6   | D(11,8,25,26)  | -178.3 |
| D(4,2,44,48)  | 54.2   | D(8,7,28,26)  | 0.8    | D(8,25,29,32)  | 54.8   | D(15,14,16,21) | 1.0    | D(5,6,9,10)    | 177.0  | D(11,8,25,29)  | 1.8    |
| D(7,2,44,48)  | -114.0 | D(8,7,28,33)  | -178.8 | D(26,25,29,30) | 114.9  | D(5,16,21,22)  | -51.3  | D(13,6,9,3)    | 177.8  | D(3,9,10,4)    | 0.1    |
| D(38,2,44,48) | -31.5  | D(7,8,11,4)   | 3.6    | D(26,25,29,31) | -4.6   | D(5,16,21,23)  | -171.1 | D(13,6,9,10)   | -1.6   | D(6,9,10,4)    | 179.5  |
| D(40,2,44,48) | -144.0 | D(7,8,11,12)  | -177.0 | D(12,3,9,6)    | -179.0 | D(11,4,10,9)   | -0.1   | D(8,11,12,3)   | -179.5 | D(4,11,12,3)   | -0.1   |

|               |       |               |        |               |        |              |       |               |       |              |        |
|---------------|-------|---------------|--------|---------------|--------|--------------|-------|---------------|-------|--------------|--------|
| D(41,2,44,48) | 179.2 | D(25,8,11,4)  | -177.8 | D(25,26,28,7) | -0.6   | D(2,4,11,8)  | -9.3  | D(6,13,14,15) | 179.8 | D(9,3,12,11) | 0.1    |
| D(42,2,44,48) | 142.8 | D(25,8,11,12) | 1.6    | D(1,3,9,10)   | -171.0 | D(2,4,11,12) | 171.3 | D(6,13,14,16) | -0.1  | D(2,4,10,9)  | -171.0 |

\* For the atomic indices refer to Figure S1

**Fig. S2** Pictorial representations of important Kohn-Sham molecular orbitals of  $[1]^{2+}$ .

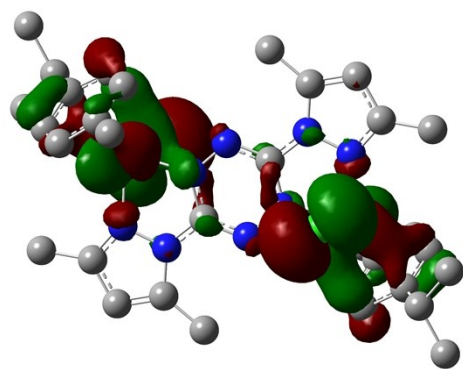

**HOSO**

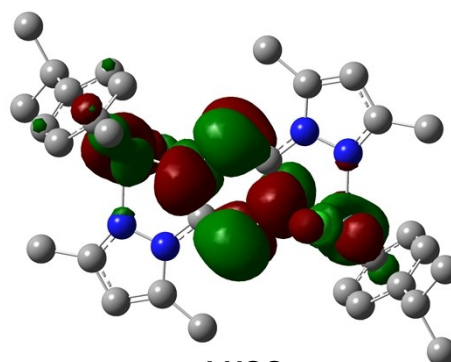

**LUSO**

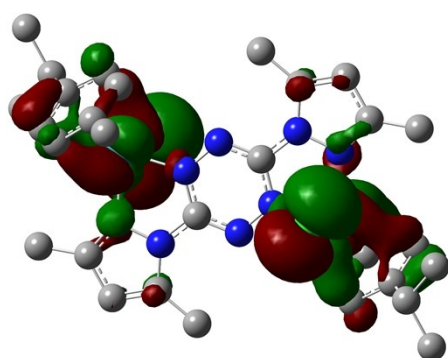

**HOSO - 1**

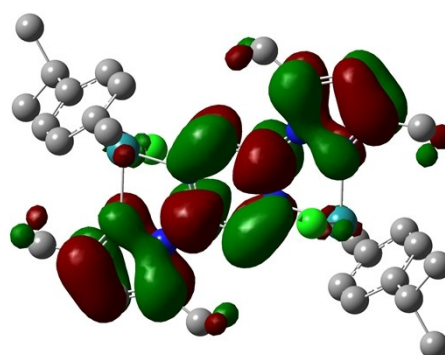

**LUSO + 1**

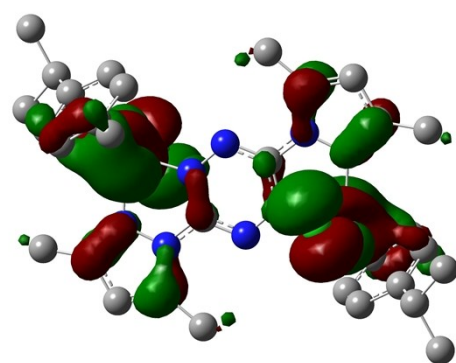

**HOSO - 2**

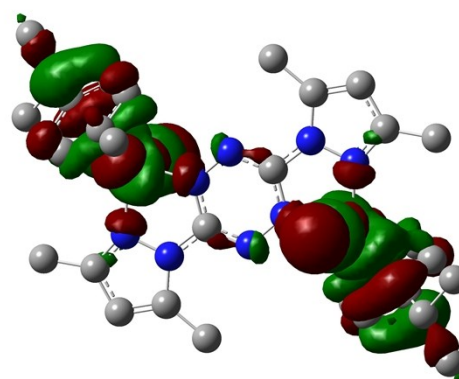

**LUSO + 2**

**Table S6.** Calculated energies of Kohn-Sham molecular orbitals (MO) at the B3LYP Level and the contributions of various molecular groups to the MOs of [1]<sup>2+</sup>.

| Sr. No. | MO's    | Energy(eV) | Contribution of the group to MO (%) |    |    |       |
|---------|---------|------------|-------------------------------------|----|----|-------|
|         |         |            | bpytz                               | Cl | Ru | p-cym |
| 188     | LUMO+10 | -5.73      | 15                                  | 2  | 14 | 70    |
| 187     | LUMO+9  | -5.76      | 2                                   | 2  | 16 | 82    |
| 186     | LUMO+8  | -5.84      | 6                                   | 0  | 20 | 74    |
| 185     | LUMO+7  | -5.88      | 3                                   | 0  | 16 | 80    |
| 184     | LUMO+6  | -6.17      | 79                                  | 0  | 4  | 16    |
| 183     | LUMO+5  | -6.72      | 17                                  | 0  | 53 | 30    |
| 182     | LUMO+4  | -6.72      | 17                                  | 0  | 55 | 29    |
| 181     | LUMO+3  | -7.19      | 6                                   | 17 | 52 | 26    |
| 180     | LUMO+2  | -7.19      | 6                                   | 18 | 50 | 26    |
| 179     | LUMO+1  | -7.71      | 97                                  | 0  | 2  | 2     |
| 178     | LUMO    | -9.04      | 77                                  | 2  | 16 | 4     |
| 177     | HOMO    | -11.13     | 5                                   | 42 | 42 | 10    |
| 176     | HOMO-1  | -11.17     | 5                                   | 46 | 38 | 10    |
| 175     | HOMO-2  | -11.21     | 14                                  | 28 | 48 | 10    |
| 174     | HOMO-3  | -11.49     | 15                                  | 54 | 28 | 4     |
| 173     | HOMO-4  | -11.86     | 14                                  | 58 | 16 | 12    |
| 172     | HOMO-5  | -11.92     | 25                                  | 40 | 22 | 14    |
| 171     | HOMO-6  | -12.16     | 79                                  | 16 | 4  | 0     |
| 170     | HOMO-7  | -12.38     | 34                                  | 10 | 48 | 6     |
| 169     | HOMO-8  | -12.44     | 37                                  | 10 | 48 | 6     |
| 168     | HOMO-9  | -12.75     | 20                                  | 32 | 40 | 8     |
| 167     | HOMO-10 | -12.94     | 32                                  | 16 | 38 | 12    |

**Table S7** Various bond lengths (Å) in optimised [1]<sup>2+</sup>

| <b>Definition*</b> | <b>Value</b> | <b>Definition*</b> | <b>Value</b> | <b>Definition*</b> | <b>Value</b> |
|--------------------|--------------|--------------------|--------------|--------------------|--------------|
| R (1,3)            | 2.0310       | R(21,22)           | 1.0943       | R(63,73)           | 1.5140       |
| R (1,5)            | 2.1000       | R(21,23)           | 1.0921       | R(64,65)           | 1.4337       |
| R (1,37)           | 2.4190       | R(21,24)           | 1.0959       | R(64,69)           | 1.0823       |
| R (1,63)           | 2.3990       | R(25,26)           | 1.3716       | R(65,66)           | 1.4116       |
| R (1,64)           | 2.3450       | R(25,29)           | 1.4916       | R(65,70)           | 1.0857       |
| R (1,65)           | 2.3010       | R(26,27)           | 1.0805       | R(66,67)           | 1.4349       |
| R (1,66)           | 2.3530       | R(26,28)           | 1.4201       | R(66,83)           | 1.5036       |
| R (1,67)           | 2.2700       | R(28,33)           | 1.4931       | R(67,68)           | 1.4073       |
| R (1,68)           | 2.2800       | R(29,30)           | 1.0952       | R(67,71)           | 1.0849       |
| R (2,4)            | 2.0310       | R(29,31)           | 1.0922       | R(68,72)           | 1.0843       |
| R (2,7)            | 2.1000       | R(29,32)           | 1.0946       | R(73,74)           | 1.0967       |
| R (2,38)           | 2.4190       | R(33,34)           | 1.0959       | R(73,75)           | 1.5498       |
| R (2,39)           | 2.3990       | R(33,35)           | 1.0921       | R(73,79)           | 1.5332       |
| R (2,40)           | 2.3450       | R(33,36)           | 1.0943       | R(75,76)           | 1.0957       |
| R (2,41)           | 2.3010       | R(39,40)           | 1.4068       | R(75,77)           | 1.0942       |
| R (2,42)           | 2.3530       | R(39,44)           | 1.4403       | R(75,78)           | 1.0954       |
| R (2,43)           | 2.2700       | R(39,49)           | 1.5140       | R(79,80)           | 1.0949       |
| R (2,44)           | 2.2800       | R(40,41)           | 1.4337       | R(79,81)           | 1.0938       |
| R (3,9)            | 1.3670       | R(40,45)           | 1.0823       | R(79,82)           | 1.0966       |
| R (3,12)           | 1.3210       | R(41,42)           | 1.4116       | R(83,84)           | 1.0933       |
| R (4,10)           | 1.3210       | R(41,46)           | 1.0857       | R(83,85)           | 1.0976       |
| R (4,11)           | 1.3670       | R(42,43)           | 1.4349       | R(83,86)           | 1.0942       |
| R (5,6)            | 1.3840       | R(42,59)           | 1.5036       |                    |              |
| R (5,16)           | 1.3300       | R(43,44)           | 1.4073       |                    |              |
| R (6,9)            | 1.3770       | R(43,47)           | 1.0849       |                    |              |
| R (6,13)           | 1.3900       | R(44,48)           | 1.0843       |                    |              |
| R (7,8)            | 1.3840       | R(49,50)           | 1.0967       |                    |              |
| R (7,28)           | 1.3300       | R(49,51)           | 1.5332       |                    |              |
| R (8,11)           | 1.3770       | R(49,55)           | 1.5498       |                    |              |
| R (8,25)           | 1.3900       | R(51,52)           | 1.0966       |                    |              |
| R (9,10)           | 1.3260       | R(51,53)           | 1.0938       |                    |              |
| R (11,12)          | 1.3260       | R(51,54)           | 1.0949       |                    |              |
| R (13,14)          | 1.3720       | R(55,56)           | 1.0954       |                    |              |
| R (13,17)          | 1.4920       | R(55,57)           | 1.0942       |                    |              |
| R (14,15)          | 1.0810       | R(55,58)           | 1.0957       |                    |              |
| R (14,16)          | 1.4200       | R(59,60)           | 1.0933       |                    |              |
| R (16,21)          | 1.4930       | R(59,61)           | 1.0942       |                    |              |
| R (17,18)          | 1.0950       | R(59,62)           | 1.0976       |                    |              |
| R (17,19)          | 1.0920       | R(63,64)           | 1.4068       |                    |              |
| R (17,20)          | 1.0950       | R(63,68)           | 1.4403       |                    |              |

**Table S8** Various bond angles (°) in optimised [1]<sup>2+</sup>.

| Definition* | Value   |
|-------------|--------|-------------|--------|-------------|--------|-------------|--------|-------------|--------|-------------|---------|
| A(3,1,5)    | 77.03  | A(7,2,40)   | 104.71 | A(6,9,10)   | 120.44 | A(30,29,32) | 108.01 | A(49,51,54) | 111.36 | A(63,73,74) | 106.40  |
| A(3,1,37)   | 83.67  | A(7,2,41)   | 99.18  | A(4,10,9)   | 117.72 | A(31,29,32) | 108.68 | A(52,51,53) | 106.88 | A(63,73,75) | 108.06  |
| A(3,1,63)   | 150.60 | A(7,2,42)   | 118.15 | A(4,11,8)   | 115.21 | A(28,33,34) | 111.37 | A(52,51,54) | 109.42 | A(63,73,79) | 114.64  |
| A(3,1,64)   | 166.40 | A(7,2,43)   | 152.36 | A(4,11,12)  | 124.34 | A(28,33,35) | 110.00 | A(53,51,54) | 107.52 | A(74,73,75) | 108.13  |
| A(3,1,65)   | 130.60 | A(7,2,44)   | 165.81 | A(8,11,12)  | 120.44 | A(28,33,36) | 110.79 | A(49,55,56) | 112.23 | A(74,73,79) | 107.96  |
| A(3,1,66)   | 103.10 | A(38,2,39)  | 88.03  | A(3,12,11)  | 117.72 | A(34,33,35) | 107.69 | A(49,55,57) | 109.22 | A(75,73,79) | 111.35  |
| A(3,1,67)   | 97.11  | A(38,2,40)  | 109.93 | A(6,13,14)  | 105.23 | A(34,33,36) | 108.60 | A(49,55,58) | 111.20 | A(73,75,76) | 111.20  |
| A(3,1,68)   | 116.50 | A(38,2,41)  | 145.59 | A(6,13,17)  | 125.09 | A(35,33,36) | 108.28 | A(56,55,57) | 107.81 | A(73,75,77) | 109.22  |
| A(5,1,37)   | 84.05  | A(38,2,42)  | 157.63 | A(14,13,17) | 129.68 | A(2,39,49)  | 131.48 | A(56,55,58) | 108.23 | A(73,75,78) | 112.23  |
| A(5,1,63)   | 130.10 | A(38,2,43)  | 122.56 | A(13,14,15) | 126.00 | A(40,39,44) | 116.80 | A(57,55,58) | 108.00 | A(76,75,77) | 108.00  |
| A(5,1,64)   | 104.70 | A(38,2,44)  | 92.98  | A(13,14,16) | 107.94 | A(40,39,49) | 123.88 | A(42,59,60) | 111.67 | A(76,75,78) | 108.23  |
| A(5,1,65)   | 99.18  | A(39,2,41)  | 63.59  | A(15,14,16) | 126.06 | A(44,39,49) | 119.31 | A(42,59,61) | 111.72 | A(77,75,78) | 107.81  |
| A(5,1,66)   | 118.20 | A(39,2,42)  | 75.62  | A(5,16,14)  | 109.41 | A(2,40,45)  | 127.00 | A(42,59,62) | 109.51 | A(73,79,80) | 111.36  |
| A(5,1,67)   | 152.40 | A(39,2,43)  | 64.16  | A(5,16,21)  | 123.30 | A(39,40,41) | 121.43 | A(60,59,61) | 108.70 | A(73,79,81) | 109.23  |
| A(5,1,68)   | 165.80 | A(40,2,42)  | 63.94  | A(14,16,21) | 127.29 | A(39,40,45) | 119.75 | A(60,59,62) | 107.65 | A(73,79,82) | 112.22  |
| A(37,1,63)  | 88.03  | A(40,2,43)  | 74.97  | A(13,17,18) | 111.79 | A(41,40,45) | 118.81 | A(61,59,62) | 107.42 | A(80,79,81) | 107.52  |
| A(37,1,64)  | 109.90 | A(40,2,44)  | 63.23  | A(13,17,19) | 108.64 | A(2,41,46)  | 125.51 | A(1,63,73)  | 131.48 | A(80,79,82) | 109.42  |
| A(37,1,65)  | 145.60 | A(41,2,43)  | 63.88  | A(13,17,20) | 111.32 | A(40,41,42) | 121.88 | A(64,63,68) | 116.80 | A(81,79,82) | 106.88  |
| A(37,1,66)  | 157.60 | A(41,2,44)  | 75.54  | A(18,17,19) | 108.68 | A(40,41,46) | 118.98 | A(64,63,73) | 123.88 | A(66,83,84) | 111.67  |
| A(37,1,67)  | 122.60 | A(42,2,44)  | 64.84  | A(18,17,20) | 108.01 | A(42,41,46) | 119.13 | A(68,63,73) | 119.31 | A(66,83,85) | 109.51  |
| A(37,1,68)  | 92.98  | A(1,3,9)    | 117.10 | A(19,17,20) | 108.30 | A(2,42,59)  | 130.26 | A(1,64,69)  | 127.00 | A(66,83,86) | 111.72  |
| A(63,1,65)  | 63.59  | A(1,3,12)   | 124.50 | A(16,21,22) | 110.79 | A(41,42,43) | 116.31 | A(63,64,65) | 121.43 | A(84,83,85) | 107.65  |
| A(63,1,66)  | 75.62  | A(9,3,12)   | 117.94 | A(16,21,23) | 110.00 | A(41,42,59) | 122.26 | A(63,64,69) | 119.75 | A(84,83,86) | 108.70  |
| A(63,1,67)  | 64.16  | A(2,4,10)   | 124.50 | A(16,21,24) | 111.37 | A(43,42,59) | 121.41 | A(65,64,69) | 118.81 | A(85,83,86) | 107.42  |
| A(64,1,66)  | 63.94  | A(2,4,11)   | 117.10 | A(22,21,23) | 108.28 | A(2,43,47)  | 122.99 | A(1,65,70)  | 125.51 |             | Cont... |
| A(64,1,67)  | 74.97  | A(10,4,11)  | 117.94 | A(22,21,24) | 108.60 | A(42,43,44) | 121.86 | A(64,65,66) | 121.88 |             |         |

|            |        |            |        |             |        |             |        |             |        |  |  |
|------------|--------|------------|--------|-------------|--------|-------------|--------|-------------|--------|--|--|
| A(64,1,68) | 63.23  | A(1,5,6)   | 113.59 | A(23,21,24) | 107.69 | A(42,43,47) | 119.00 | A(64,65,70) | 118.98 |  |  |
| A(65,1,67) | 63.88  | A(1,5,16)  | 139.49 | A(8,25,26)  | 105.23 | A(44,43,47) | 119.09 | A(66,65,70) | 119.13 |  |  |
| A(65,1,68) | 75.54  | A(6,5,16)  | 106.45 | A(8,25,29)  | 125.09 | A(2,44,48)  | 123.66 | A(1,66,83)  | 130.26 |  |  |
| A(66,1,68) | 64.84  | A(5,6,9)   | 116.34 | A(26,25,29) | 129.68 | A(39,44,43) | 121.29 | A(65,66,67) | 116.31 |  |  |
| A(4,2,7)   | 77.03  | A(5,6,13)  | 110.96 | A(25,26,27) | 126.00 | A(39,44,48) | 119.07 | A(65,66,83) | 122.26 |  |  |
| A(4,2,38)  | 83.67  | A(9,6,13)  | 132.68 | A(25,26,28) | 107.94 | A(43,44,48) | 119.64 | A(67,66,83) | 121.41 |  |  |
| A(4,2,39)  | 150.60 | A(2,7,8)   | 113.59 | A(27,26,28) | 126.06 | A(39,49,50) | 106.40 | A(1,67,71)  | 122.99 |  |  |
| A(4,2,40)  | 166.40 | A(2,7,28)  | 139.49 | A(7,28,26)  | 109.41 | A(39,49,51) | 114.64 | A(66,67,68) | 121.86 |  |  |
| A(4,2,41)  | 130.60 | A(8,7,28)  | 106.45 | A(7,28,33)  | 123.30 | A(39,49,55) | 108.06 | A(66,67,71) | 119.00 |  |  |
| A(4,2,42)  | 103.10 | A(7,8,11)  | 116.34 | A(26,28,33) | 127.29 | A(50,49,51) | 107.96 | A(68,67,71) | 119.09 |  |  |
| A(4,2,43)  | 97.11  | A(7,8,25)  | 110.96 | A(25,29,30) | 111.32 | A(50,49,55) | 108.13 | A(1,68,72)  | 123.66 |  |  |
| A(4,2,44)  | 116.50 | A(11,8,25) | 132.68 | A(25,29,31) | 108.64 | A(51,49,55) | 111.35 | A(63,68,67) | 121.29 |  |  |
| A(7,2,38)  | 84.05  | A(3,9,6)   | 115.21 | A(25,29,32) | 111.79 | A(49,51,52) | 112.22 | A(63,68,72) | 119.07 |  |  |
| A(7,2,39)  | 130.10 | A(3,9,10)  | 124.34 | A(30,29,31) | 108.30 | A(49,51,53) | 109.23 | A(67,68,72) | 119.64 |  |  |

\* For the atomic indices refer to Figure S1



**Table S9** Various dihedral angles (°) in optimised [1]<sup>2+</sup>.

| Definition*  | Value  | Definition*   | Value  | Definition*   | Value  | Definition*   | Value  | Definition*   | Value  | Definition*    | Value  |
|--------------|--------|---------------|--------|---------------|--------|---------------|--------|---------------|--------|----------------|--------|
| D(5,1,3,9)   | -7.9   | D(37,1,64,69) | -62.4  | D(43,2,4,10)  | -27.6  | D(38,2,42,59) | -135.2 | D(5,6,13,14)  | -0.4   | D(5,16,21,24)  | 67.9   |
| D(5,1,3,12)  | -179.9 | D(66,1,64,69) | 141.0  | D(43,2,4,11)  | 160.5  | D(39,2,42,59) | -179.5 | D(5,6,13,17)  | 179.3  | D(14,16,21,22) | 126.5  |
| D(37,1,3,9)  | 77.4   | D(67,1,64,69) | 177.9  | D(44,2,4,10)  | 4.4    | D(40,2,42,59) | 145.8  | D(9,6,13,14)  | 177.7  | D(14,16,21,23) | 6.8    |
| D(37,1,3,12) | -94.6  | D(68,1,64,69) | -145.5 | D(44,2,4,11)  | -167.6 | D(44,2,42,59) | -143.1 | D(9,6,13,17)  | -2.5   | D(14,16,21,24) | -112.5 |
| D(63,1,3,9)  | 151.9  | D(3,1,65,70)  | 68.9   | D(4,2,7,8)    | -6.2   | D(4,2,43,47)  | 12.7   | D(2,7,8,11)   | 3.9    | D(8,25,26,27)  | -179.7 |
| D(63,1,3,12) | -20.1  | D(5,1,65,70)  | -11.9  | D(4,2,7,28)   | -176.9 | D(7,2,43,47)  | 88.3   | D(2,7,8,25)   | -174.6 | D(8,25,26,28)  | 0.2    |
| D(64,1,3,9)  | -106.9 | D(37,1,65,70) | -104.7 | D(38,2,7,8)   | 78.6   | D(38,2,43,47) | -74.3  | D(28,7,8,11)  | 177.6  | D(29,25,26,27) | 0.1    |
| D(64,1,3,12) | 81.1   | D(63,1,65,70) | -142.3 | D(38,2,7,28)  | -92.1  | D(39,2,43,47) | -143.6 | D(28,7,8,25)  | -0.9   | D(29,25,26,28) | 179.9  |
| D(65,1,3,9)  | -99.0  | D(67,1,65,70) | 145.1  | D(39,2,7,8)   | 161.0  | D(40,2,43,47) | -178.6 | D(2,7,28,26)  | 172.1  | D(8,25,29,30)  | -64.7  |
| D(65,1,3,12) | 89.1   | D(68,1,65,70) | -178.4 | D(39,2,7,28)  | -9.7   | D(41,2,43,47) | 144.7  | D(2,7,28,33)  | -7.6   | D(8,25,29,31)  | 176.2  |
| D(66,1,3,9)  | -124.3 | D(3,1,66,83)  | 29.7   | D(40,2,7,8)   | -172.3 | D(4,2,44,48)  | 50.7   | D(8,7,28,26)  | 1.0    | D(8,25,29,32)  | 56.2   |
| D(66,1,3,12) | 63.8   | D(5,1,66,83)  | -52.4  | D(40,2,7,28)  | 17.0   | D(7,2,44,48)  | -111.2 | D(8,7,28,33)  | -178.7 | D(26,25,29,30) | 115.6  |
| D(67,1,3,9)  | -160.5 | D(37,1,66,83) | 135.2  | D(41,2,7,8)   | -135.9 | D(38,2,44,48) | -33.8  | D(7,8,11,4)   | 2.7    | D(26,25,29,31) | -3.6   |
| D(67,1,3,12) | 27.6   | D(63,1,66,83) | 179.5  | D(41,2,7,28)  | 53.4   | D(40,2,44,48) | -144.6 | D(7,8,11,12)  | -178.2 | D(26,25,29,32) | -123.5 |
| D(68,1,3,9)  | 167.6  | D(64,1,66,83) | -145.8 | D(42,2,7,8)   | -104.3 | D(41,2,44,48) | 179.1  | D(25,8,11,4)  | -179.2 | D(25,26,28,7)  | -0.7   |
| D(68,1,3,12) | -4.4   | D(68,1,66,83) | 143.1  | D(42,2,7,28)  | 85.0   | D(42,2,44,48) | 143.2  | D(25,8,11,12) | -0.1   | D(25,26,28,33) | 179.0  |
| D(3,1,5,6)   | 6.2    | D(3,1,67,71)  | -12.7  | D(43,2,7,8)   | -86.7  | D(1,3,9,6)    | 8.4    | D(7,8,25,26)  | 0.4    | D(27,26,28,7)  | 179.2  |
| D(3,1,5,16)  | 176.9  | D(5,1,67,71)  | -88.3  | D(43,2,7,28)  | 102.6  | D(1,3,9,10)   | -172.6 | D(7,8,25,29)  | -179.3 | D(27,26,28,33) | -1.2   |
| D(37,1,5,6)  | -78.6  | D(37,1,67,71) | 74.3   | D(44,2,7,8)   | 157.2  | D(12,3,9,6)   | -179.1 | D(11,8,25,26) | -177.7 | D(7,28,33,34)  | -67.9  |
| D(37,1,5,16) | 92.1   | D(63,1,67,71) | 143.6  | D(44,2,7,28)  | -13.6  | D(12,3,9,10)  | 0.0    | D(11,8,25,29) | 2.5    | D(7,28,33,35)  | 172.8  |
| D(63,1,5,6)  | -161.0 | D(64,1,67,71) | 178.6  | D(4,2,39,49)  | 85.6   | D(1,3,12,11)  | 171.9  | D(3,9,10,4)   | 0.0    | D(7,28,33,36)  | 53.1   |
| D(63,1,5,16) | 9.7    | D(65,1,67,71) | -144.7 | D(7,2,39,49)  | -68.3  | D(9,3,12,11)  | 0.0    | D(6,9,10,4)   | 179.1  | D(26,28,33,34) | 112.5  |
| D(64,1,5,6)  | 172.3  | D(3,1,68,72)  | -50.7  | D(38,2,39,49) | 12.2   | D(2,4,10,9)   | -171.9 | D(4,11,12,3)  | 0.0    | D(26,28,33,35) | -6.8   |
| D(64,1,5,16) | -17.0  | D(5,1,68,72)  | 111.2  | D(41,2,39,49) | -147.7 | D(11,4,10,9)  | 0.0    | D(8,11,12,3)  | -179.1 | D(26,28,33,36) | -126.5 |
| D(65,1,5,6)  | 135.9  | D(37,1,68,72) | 33.8   | D(42,2,39,49) | 176.8  | D(2,4,11,8)   | -8.4   | D(6,13,14,15) | 179.7  | D(44,39,40,41) | 4.0    |
| D(65,1,5,16) | -53.4  | D(64,1,68,72) | 144.6  | D(43,2,39,49) | 140.1  | D(2,4,11,12)  | 172.6  | D(6,13,14,16) | -0.2   | D(44,39,40,45) | -175.3 |

|                |        |                |        |                |        |                |        |                |        |                |        |
|----------------|--------|----------------|--------|----------------|--------|----------------|--------|----------------|--------|----------------|--------|
| D(66,1,5,6)    | 104.3  | D(65,1,68,72)  | -179.1 | D(4,2,40,45)   | -122.1 | D(10,4,11,8)   | 179.1  | D(17,13,14,15) | -0.1   | D(49,39,40,41) | -177.4 |
| D(66,1,5,16)   | -85.0  | D(66,1,68,72)  | -143.2 | D(7,2,40,45)   | -26.5  | D(10,4,11,12)  | 0.0    | D(17,13,14,16) | -179.9 | D(49,39,40,45) | 3.3    |
| D(67,1,5,6)    | 86.7   | D(7,2,4,10)    | 179.9  | D(38,2,40,45)  | 62.4   | D(1,5,6,9)     | -3.9   | D(6,13,17,18)  | -56.2  | D(40,39,44,43) | -5.9   |
| D(67,1,5,16)   | -102.6 | D(7,2,4,11)    | 7.9    | D(42,2,40,45)  | -141.0 | D(1,5,6,13)    | 174.6  | D(6,13,17,19)  | -176.2 | D(40,39,44,48) | 173.8  |
| D(68,1,5,6)    | -157.2 | D(38,2,4,10)   | 94.6   | D(43,2,40,45)  | -177.9 | D(16,5,6,9)    | -177.6 | D(6,13,17,20)  | 64.7   | D(49,39,44,43) | 175.4  |
| D(68,1,5,16)   | 13.6   | D(38,2,4,11)   | -77.4  | D(44,2,40,45)  | 145.5  | D(16,5,6,13)   | 0.9    | D(14,13,17,18) | 123.5  | D(49,39,44,48) | -4.9   |
| D(3,1,63,73)   | -85.6  | D(39,2,4,10)   | 20.1   | D(4,2,41,46)   | -68.9  | D(1,5,16,14)   | -172.1 | D(14,13,17,19) | 3.6    | D(2,39,49,50)  | -47.9  |
| D(5,1,63,73)   | 68.3   | D(39,2,4,11)   | -151.9 | D(7,2,41,46)   | 11.9   | D(1,5,16,21)   | 7.6    | D(14,13,17,20) | -115.6 | D(2,39,49,51)  | 71.3   |
| D(37,1,63,73)  | -12.2  | D(40,2,4,10)   | -81.1  | D(38,2,41,46)  | 104.7  | D(6,5,16,14)   | -1.0   | D(13,14,16,5)  | 0.7    | D(2,39,49,55)  | -163.9 |
| D(65,1,63,73)  | 147.7  | D(40,2,4,11)   | 106.9  | D(39,2,41,46)  | 142.3  | D(6,5,16,21)   | 178.7  | D(13,14,16,21) | -179.0 | D(40,39,49,50) | -141.4 |
| D(66,1,63,73)  | -176.8 | D(41,2,4,10)   | -89.1  | D(43,2,41,46)  | -145.1 | D(5,6,9,3)     | -2.7   | D(15,14,16,5)  | -179.2 | D(40,39,49,51) | -22.2  |
| D(67,1,63,73)  | -140.1 | D(41,2,4,11)   | 99.0   | D(44,2,41,46)  | 178.4  | D(5,6,9,10)    | 178.2  | D(15,14,16,21) | 1.2    | D(40,39,49,55) | 102.6  |
| D(3,1,64,69)   | 122.1  | D(42,2,4,10)   | -63.8  | D(4,2,42,59)   | -29.7  | D(13,6,9,3)    | 179.2  | D(5,16,21,22)  | -53.1  | D(44,39,49,50) | 37.1   |
| D(5,1,64,69)   | 26.5   | D(42,2,4,11)   | 124.3  | D(7,2,42,59)   | 52.4   | D(13,6,9,10)   | 0.1    | D(5,16,21,23)  | -172.8 | D(44,39,49,51) | 156.4  |
| D(44,39,49,55) | -78.8  | D(50,49,55,58) | 179.9  | D(67,66,83,85) | -84.9  | D(63,73,75,78) | -56.1  | D(47,43,44,39) | 179.3  | D(69,64,65,70) | -0.2   |
| D(39,40,41,42) | 2.0    | D(51,49,55,56) | -177.2 | D(67,66,83,86) | 34.0   | D(74,73,75,76) | -179.9 | D(47,43,44,48) | -0.4   | D(64,65,66,67) | 6.1    |
| D(39,40,41,46) | -179.1 | D(51,49,55,57) | -57.7  | D(66,67,68,63) | -1.9   | D(74,73,75,77) | -60.8  | D(39,49,51,52) | 65.5   | D(64,65,66,83) | -175.3 |
| D(45,40,41,42) | -178.6 | D(51,49,55,58) | 61.4   | D(66,67,68,72) | 177.8  | D(74,73,75,78) | 58.7   | D(39,49,51,53) | -176.1 | D(70,65,66,67) | -175.1 |
| D(45,40,41,46) | 0.2    | D(68,63,64,65) | -4.0   | D(71,67,68,63) | -179.3 | D(79,73,75,76) | -61.4  | D(39,49,51,54) | -57.5  | D(70,65,66,83) | 3.6    |
| D(40,41,42,43) | -6.1   | D(68,63,64,69) | 175.3  | D(71,67,68,72) | 0.4    | D(79,73,75,77) | 57.7   | D(50,49,51,52) | -176.1 | D(65,66,67,68) | -4.1   |
| D(40,41,42,59) | 175.3  | D(73,63,64,65) | 177.4  | D(63,73,75,76) | 65.3   | D(79,73,75,78) | 177.2  | D(50,49,51,53) | -57.7  | D(65,66,67,71) | 173.3  |
| D(46,41,42,43) | 175.1  | D(73,63,64,69) | -3.3   | D(63,73,75,77) | -175.6 | D(63,73,79,80) | 57.5   | D(50,49,51,54) | 60.9   | D(83,66,67,68) | 177.2  |
| D(46,41,42,59) | -3.6   | D(64,63,68,67) | 5.9    | D(75,73,79,80) | -179.4 | D(63,73,79,81) | 176.1  | D(55,49,51,52) | -57.5  | D(83,66,67,71) | -5.3   |
| D(41,42,43,44) | 4.1    | D(64,63,68,72) | -173.8 | D(75,73,79,81) | -60.8  | D(63,73,79,82) | -65.5  | D(55,49,51,53) | 60.8   | D(1,66,83,84)  | 68.2   |
| D(41,42,43,47) | -173.3 | D(73,63,68,67) | -175.4 | D(75,73,79,82) | 57.5   | D(74,73,79,80) | -60.9  | D(55,49,51,54) | 179.4  | D(1,66,83,85)  | -172.7 |
| D(59,42,43,44) | -177.2 | D(73,63,68,72) | 4.9    | D(64,63,73,74) | 141.4  | D(74,73,79,81) | 57.7   | D(39,49,55,56) | 56.1   | D(1,66,83,86)  | -53.8  |
| D(59,42,43,47) | 5.3    | D(1,63,73,74)  | 47.9   | D(64,63,73,75) | -102.6 | D(74,73,79,82) | 176.1  | D(39,49,55,57) | 175.6  | D(65,66,83,84) | -22.6  |
| D(2,42,59,60)  | -68.2  | D(1,63,73,75)  | 163.9  | D(64,63,73,79) | 22.2   | D(50,49,55,57) | 60.8   | D(39,49,55,58) | -65.3  | D(65,66,83,85) | 96.5   |
| D(2,42,59,61)  | 53.8   | D(1,63,73,79)  | -71.3  | D(68,63,73,74) | -37.1  | D(67,66,83,84) | 156.0  | D(50,49,55,56) | -58.7  | D(65,66,83,86) | -144.6 |

|                |       |                |        |                |       |                |        |                |       |                |        |
|----------------|-------|----------------|--------|----------------|-------|----------------|--------|----------------|-------|----------------|--------|
| D(2,42,59,62)  | 172.7 | D(68,63,73,75) | 78.8   | D(63,64,65,70) | 179.1 | D(41,42,59,62) | -96.5  | D(43,42,59,61) | -34.0 | D(42,43,44,39) | 1.9    |
| D(41,42,59,60) | 22.6  | D(68,63,73,79) | -156.4 | D(69,64,65,66) | 178.6 | D(43,42,59,60) | -156.0 | D(43,42,59,62) | 84.9  | D(42,43,44,48) | -177.8 |

\* For the atomic indices refer to Figure S1

**Fig. S3** Pictorial representations of important Kohn-Sham molecular orbitals of [1].

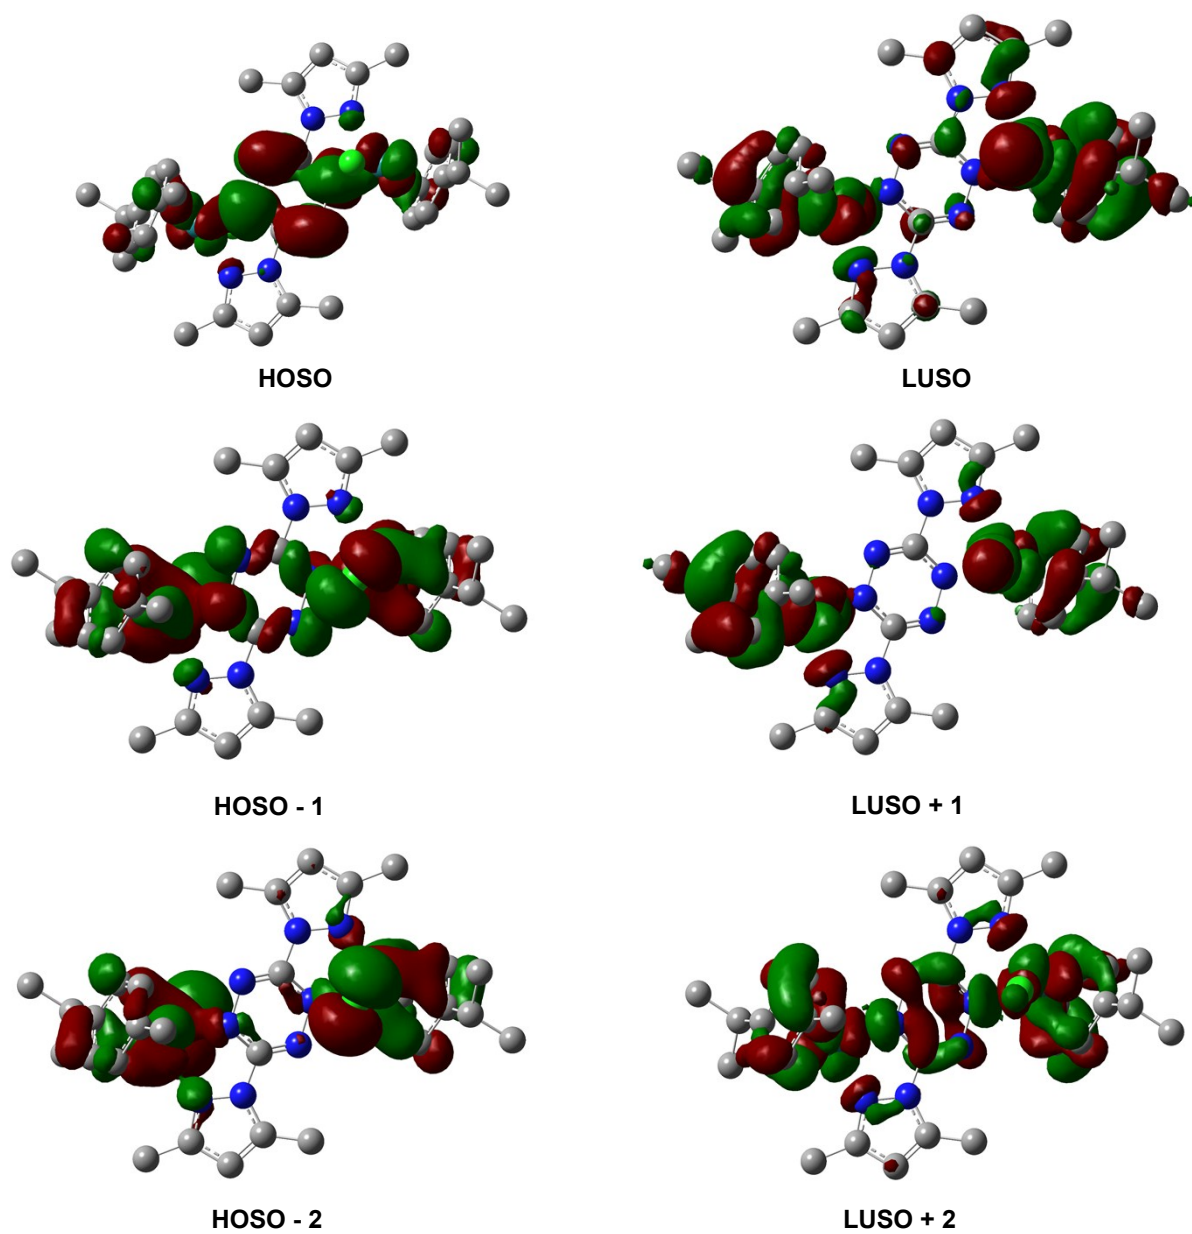

**Table S10** Calculated energies of Kohn-Sham molecular orbitals (MO) at the B3LYP Level and the contributions of various molecular groups to the MOs of [1].

| Sr. No. | MO's    | Energy(eV) | Contribution of the group to MO (%) |    |    |       |
|---------|---------|------------|-------------------------------------|----|----|-------|
|         |         |            | bpytz                               | Cl | Ru | p-cym |
| 189     | LUMO+10 | 0.78       | 5                                   | 0  | 88 | 7     |
| 188     | LUMO+9  | 0.21       | 63                                  | 0  | 15 | 21    |
| 187     | LUMO+8  | 0.07       | 8                                   | 0  | 32 | 60    |
| 186     | LUMO+7  | 0.01       | 6                                   | 1  | 26 | 67    |
| 185     | LUMO+6  | -0.07      | 9                                   | 2  | 21 | 67    |
| 184     | LUMO+5  | -0.27      | 30                                  | 1  | 12 | 57    |
| 183     | LUMO+4  | -0.55      | 31                                  | 2  | 36 | 32    |
| 182     | LUMO+3  | -0.67      | 78                                  | 0  | 9  | 12    |
| 181     | LUMO+2  | -0.83      | 19                                  | 2  | 51 | 28    |
| 180     | LUMO+1  | -0.95      | 6                                   | 11 | 50 | 32    |
| 179     | LUMO    | -0.98      | 12                                  | 11 | 46 | 31    |
| 178     | HOMO    | -3.4       | 76                                  | 0  | 16 | 8     |
| 177     | HOMO-1  | -5         | 16                                  | 24 | 44 | 15    |
| 176     | HOMO-2  | -5.14      | 6                                   | 35 | 42 | 17    |
| 175     | HOMO-3  | -5.28      | 12                                  | 30 | 47 | 11    |
| 174     | HOMO-4  | -5.47      | 13                                  | 40 | 41 | 7     |
| 173     | HOMO-5  | -5.88      | 8                                   | 35 | 44 | 12    |
| 172     | HOMO-6  | -5.9       | 9                                   | 29 | 48 | 13    |
| 171     | HOMO-7  | -6.05      | 63                                  | 29 | 8  | 1     |
| 170     | HOMO-8  | -6.31      | 48                                  | 31 | 19 | 3     |
| 169     | HOMO-9  | -6.38      | 40                                  | 27 | 30 | 3     |
| 168     | HOMO-10 | -6.41      | 74                                  | 12 | 12 | 3     |

**Table S11** Bond lengths (Å) of optimised [1].

| Definition* | Value  | Definition* | Value  | Definition* | Value  |
|-------------|--------|-------------|--------|-------------|--------|
| R(1,3)      | 2.0669 | R(21,22)    | 1.0941 | R(63,73)    | 1.517  |
| R(1,5)      | 2.1108 | R(21,23)    | 1.0927 | R(64,65)    | 1.4353 |
| R(1,37)     | 2.4326 | R(21,24)    | 1.0963 | R(64,69)    | 1.0823 |
| R(1,63)     | 2.3494 | R(25,26)    | 1.3777 | R(65,66)    | 1.4136 |
| R(1,64)     | 2.3233 | R(25,29)    | 1.4926 | R(65,70)    | 1.0857 |
| R(1,65)     | 2.2645 | R(26,27)    | 1.0803 | R(66,67)    | 1.4348 |
| R(1,66)     | 2.3045 | R(26,28)    | 1.4138 | R(66,83)    | 1.5046 |
| R(1,67)     | 2.2405 | R(28,33)    | 1.4947 | R(67,68)    | 1.4078 |
| R(1,68)     | 2.2537 | R(29,30)    | 1.0947 | R(67,71)    | 1.0844 |
| R(2,4)      | 2.0669 | R(29,31)    | 1.0929 | R(68,72)    | 1.084  |
| R(2,7)      | 2.1108 | R(29,32)    | 1.0937 | R(73,74)    | 1.0967 |
| R(2,38)     | 2.4326 | R(33,34)    | 1.0963 | R(73,75)    | 1.546  |
| R(2,39)     | 2.3494 | R(33,35)    | 1.0927 | R(73,79)    | 1.5331 |
| R(2,40)     | 2.3233 | R(33,36)    | 1.0941 | R(75,76)    | 1.0963 |
| R(2,41)     | 2.2645 | R(39,40)    | 1.406  | R(75,77)    | 1.0949 |
| R(2,42)     | 2.3045 | R(39,44)    | 1.441  | R(75,78)    | 1.0957 |
| R(2,43)     | 2.2405 | R(39,49)    | 1.517  | R(79,80)    | 1.0945 |
| R(2,44)     | 2.2537 | R(40,41)    | 1.4353 | R(79,81)    | 1.0945 |
| R(3,9)      | 1.3465 | R(40,45)    | 1.0823 | R(79,82)    | 1.0971 |
| R(3,12)     | 1.3690 | R(41,42)    | 1.4136 | R(83,84)    | 1.0937 |
| R(4,10)     | 1.3690 | R(41,46)    | 1.0857 | R(83,85)    | 1.0974 |
| R(4,11)     | 1.3465 | R(42,43)    | 1.4348 | R(83,86)    | 1.0943 |
| R(5,6)      | 1.3749 | R(42,59)    | 1.5046 |             |        |
| R(5,16)     | 1.3324 | R(43,44)    | 1.4078 |             |        |
| R(6,9)      | 1.3981 | R(43,47)    | 1.0844 |             |        |
| R(6,13)     | 1.3778 | R(44,48)    | 1.084  |             |        |
| R(7,8)      | 1.3749 | R(49,50)    | 1.0967 |             |        |
| R(7,28)     | 1.3324 | R(49,51)    | 1.5331 |             |        |
| R(8,11)     | 1.3981 | R(49,55)    | 1.546  |             |        |
| R(8,25)     | 1.3778 | R(51,52)    | 1.0971 |             |        |
| R(9,10)     | 1.3166 | R(51,53)    | 1.0945 |             |        |
| R(11,12)    | 1.3166 | R(51,54)    | 1.0945 |             |        |
| R(13,14)    | 1.3777 | R(55,56)    | 1.0957 |             |        |
| R(13,17)    | 1.4926 | R(55,57)    | 1.0949 |             |        |
| R(14,15)    | 1.0803 | R(55,58)    | 1.0963 |             |        |
| R(14,16)    | 1.4138 | R(59,60)    | 1.0937 |             |        |
| R(16,21)    | 1.4947 | R(59,61)    | 1.0943 |             |        |
| R(17,18)    | 1.0937 | R(59,62)    | 1.0974 |             |        |
| R(17,19)    | 1.0929 | R(63,64)    | 1.406  |             |        |
| R(17,20)    | 1.0947 | R(63,68)    | 1.441  |             |        |

**Table S12** Bond angles (°) of optimised [1].

| Definition* | Value  |
|-------------|--------|-------------|--------|-------------|--------|-------------|--------|-------------|--------|-------------|--------|
| A(3,1,5)    | 75.74  | A(7,2,40)   | 105.45 | A(6,9,10)   | 119.01 | A(30,29,32) | 107.48 | A(49,51,54) | 110.98 | A(63,73,74) | 106.11 |
| A(3,1,37)   | 84.31  | A(7,2,41)   | 98.31  | A(4,10,9)   | 114.85 | A(31,29,32) | 109.12 | A(52,51,53) | 106.99 | A(63,73,75) | 108.79 |
| A(3,1,63)   | 151.34 | A(7,2,42)   | 116.18 | A(4,11,8)   | 113.96 | A(28,33,34) | 111.54 | A(52,51,54) | 109.38 | A(63,73,79) | 114.47 |
| A(3,1,64)   | 163.31 | A(7,2,43)   | 150.43 | A(4,11,12)  | 127.03 | A(28,33,35) | 109.96 | A(53,51,54) | 107.71 | A(74,73,75) | 108.33 |
| A(3,1,65)   | 127.02 | A(7,2,44)   | 168.04 | A(8,11,12)  | 119.01 | A(28,33,36) | 110.84 | A(49,55,56) | 112.00 | A(74,73,79) | 107.46 |
| A(3,1,66)   | 99.07  | A(38,2,39)  | 89.87  | A(3,12,11)  | 114.85 | A(34,33,35) | 107.70 | A(49,55,57) | 109.74 | A(75,73,79) | 111.37 |
| A(3,1,67)   | 94.57  | A(38,2,40)  | 112.37 | A(6,13,14)  | 105.55 | A(34,33,36) | 108.32 | A(49,55,58) | 111.12 | A(73,75,76) | 111.12 |
| A(3,1,68)   | 115.97 | A(38,2,41)  | 148.36 | A(6,13,17)  | 125.26 | A(35,33,36) | 108.36 | A(56,55,57) | 107.86 | A(73,75,77) | 109.74 |
| A(5,1,37)   | 84.24  | A(38,2,42)  | 159.54 | A(14,13,17) | 129.19 | A(2,39,49)  | 130.54 | A(56,55,58) | 108.01 | A(73,75,78) | 112.00 |
| A(5,1,63)   | 131.64 | A(38,2,43)  | 123.12 | A(13,14,15) | 126.07 | A(40,39,44) | 117.24 | A(57,55,58) | 107.97 | A(76,75,77) | 107.97 |
| A(5,1,64)   | 105.45 | A(38,2,44)  | 94.25  | A(13,14,16) | 107.45 | A(40,39,49) | 123.83 | A(42,59,60) | 111.41 | A(76,75,78) | 108.01 |
| A(5,1,65)   | 98.31  | A(39,2,41)  | 64.81  | A(15,14,16) | 126.48 | A(44,39,49) | 118.92 | A(42,59,61) | 111.26 | A(77,75,78) | 107.86 |
| A(5,1,66)   | 116.18 | A(39,2,42)  | 77.46  | A(5,16,14)  | 109.34 | A(2,40,45)  | 127.20 | A(42,59,62) | 110.13 | A(73,79,80) | 110.98 |
| A(5,1,67)   | 150.43 | A(39,2,43)  | 65.43  | A(5,16,21)  | 122.95 | A(39,40,41) | 121.06 | A(60,59,61) | 108.37 | A(73,79,81) | 109.40 |
| A(5,1,68)   | 168.04 | A(40,2,42)  | 65.17  | A(14,16,21) | 127.71 | A(39,40,45) | 119.94 | A(60,59,62) | 107.79 | A(73,79,82) | 112.21 |
| A(37,1,63)  | 89.87  | A(40,2,43)  | 76.17  | A(13,17,18) | 111.68 | A(41,40,45) | 118.92 | A(61,59,62) | 107.74 | A(80,79,81) | 107.71 |
| A(37,1,64)  | 112.37 | A(40,2,44)  | 64.13  | A(13,17,19) | 108.72 | A(2,41,46)  | 125.34 | A(1,63,73)  | 130.54 | A(80,79,82) | 109.38 |
| A(37,1,65)  | 148.36 | A(41,2,43)  | 65.00  | A(13,17,20) | 111.20 | A(40,41,42) | 122.06 | A(64,63,68) | 117.24 | A(81,79,82) | 106.99 |
| A(37,1,66)  | 159.54 | A(41,2,44)  | 76.80  | A(18,17,19) | 109.12 | A(40,41,46) | 118.95 | A(64,63,73) | 123.83 | A(66,83,84) | 111.41 |
| A(37,1,67)  | 123.12 | A(42,2,44)  | 66.04  | A(18,17,20) | 107.48 | A(42,41,46) | 118.99 | A(68,63,73) | 118.92 | A(66,83,85) | 110.13 |
| A(37,1,68)  | 94.25  | A(1,3,9)    | 118.35 | A(19,17,20) | 108.57 | A(2,42,59)  | 129.29 | A(1,64,69)  | 127.20 | A(66,83,86) | 111.26 |
| A(63,1,65)  | 64.81  | A(1,3,12)   | 122.90 | A(16,21,22) | 110.84 | A(41,42,43) | 116.37 | A(63,64,65) | 121.06 | A(84,83,85) | 107.79 |
| A(63,1,66)  | 77.46  | A(9,3,12)   | 118.13 | A(16,21,23) | 109.96 | A(41,42,59) | 122.40 | A(63,64,69) | 119.94 | A(84,83,86) | 108.37 |
| A(63,1,67)  | 65.43  | A(2,4,10)   | 122.90 | A(16,21,24) | 111.54 | A(43,42,59) | 121.21 | A(65,64,69) | 118.92 | A(85,83,86) | 107.74 |
| A(64,1,66)  | 65.17  | A(2,4,11)   | 118.35 | A(22,21,23) | 108.36 | A(2,43,47)  | 122.23 | A(1,65,70)  | 125.34 |             |        |
| A(64,1,67)  | 76.17  | A(10,4,11)  | 118.13 | A(22,21,24) | 108.32 | A(42,43,44) | 121.83 | A(64,65,66) | 122.06 |             |        |

|            |        |            |        |             |        |             |        |             |        |  |  |
|------------|--------|------------|--------|-------------|--------|-------------|--------|-------------|--------|--|--|
| A(64,1,68) | 64.13  | A(1,5,6)   | 114.36 | A(23,21,24) | 107.70 | A(42,43,47) | 118.92 | A(64,65,70) | 118.95 |  |  |
| A(65,1,67) | 65.00  | A(1,5,16)  | 138.70 | A(8,25,26)  | 105.55 | A(44,43,47) | 119.06 | A(66,65,70) | 118.99 |  |  |
| A(65,1,68) | 76.80  | A(6,5,16)  | 106.62 | A(8,25,29)  | 125.26 | A(2,44,48)  | 123.52 | A(1,66,83)  | 129.29 |  |  |
| A(66,1,68) | 66.04  | A(5,6,9)   | 116.75 | A(26,25,29) | 129.19 | A(39,44,43) | 121.24 | A(65,66,67) | 116.37 |  |  |
| A(4,2,7)   | 75.74  | A(5,6,13)  | 111.03 | A(25,26,27) | 126.07 | A(39,44,48) | 119.12 | A(65,66,83) | 122.40 |  |  |
| A(4,2,38)  | 84.31  | A(9,6,13)  | 132.20 | A(25,26,28) | 107.45 | A(43,44,48) | 119.59 | A(67,66,83) | 121.21 |  |  |
| A(4,2,39)  | 151.34 | A(2,7,8)   | 114.36 | A(27,26,28) | 126.48 | A(39,49,50) | 106.11 | A(1,67,71)  | 122.23 |  |  |
| A(4,2,40)  | 163.31 | A(2,7,28)  | 138.70 | A(7,28,26)  | 109.34 | A(39,49,51) | 114.47 | A(66,67,68) | 121.83 |  |  |
| A(4,2,41)  | 127.02 | A(8,7,28)  | 106.62 | A(7,28,33)  | 122.95 | A(39,49,55) | 108.79 | A(66,67,71) | 118.92 |  |  |
| A(4,2,42)  | 99.07  | A(7,8,11)  | 116.75 | A(26,28,33) | 127.71 | A(50,49,51) | 107.46 | A(68,67,71) | 119.06 |  |  |
| A(4,2,43)  | 94.57  | A(7,8,25)  | 111.03 | A(25,29,30) | 111.20 | A(50,49,55) | 108.33 | A(1,68,72)  | 123.52 |  |  |
| A(4,2,44)  | 115.97 | A(11,8,25) | 132.20 | A(25,29,31) | 108.72 | A(51,49,55) | 111.37 | A(63,68,67) | 121.24 |  |  |
| A(7,2,38)  | 84.24  | A(3,9,6)   | 113.96 | A(25,29,32) | 111.68 | A(49,51,52) | 112.21 | A(63,68,72) | 119.12 |  |  |
| A(7,2,39)  | 131.64 | A(3,9,10)  | 127.03 | A(30,29,31) | 108.57 | A(49,51,53) | 109.40 | A(67,68,72) | 119.59 |  |  |

\* For the atomic indices refer to Figure S1



**Table S13** Various dihedral angles (°) in optimised [1]

| Definition*  | Value  | Definition*   | Value  | Definition*   | Value  | Definition*   | Value  | Definition*   | Value  | Definition*    | Value  |
|--------------|--------|---------------|--------|---------------|--------|---------------|--------|---------------|--------|----------------|--------|
| D(5,1,3,9)   | -8.5   | D(37,1,64,69) | -61.7  | D(43,2,4,10)  | -29.1  | D(38,2,42,59) | -126.5 | D(5,6,13,14)  | -0.3   | D(5,16,21,24)  | 69.5   |
| D(5,1,3,12)  | -179.3 | D(66,1,64,69) | 140.5  | D(43,2,4,11)  | 160.2  | D(39,2,42,59) | -179.5 | D(5,6,13,17)  | 179.5  | D(14,16,21,22) | 128.2  |
| D(37,1,3,9)  | 77.0   | D(67,1,64,69) | 177.9  | D(44,2,4,10)  | 1.8    | D(40,2,42,59) | 145.8  | D(9,6,13,14)  | 178.3  | D(14,16,21,23) | 8.4    |
| D(37,1,3,12) | -93.8  | D(68,1,64,69) | -145.3 | D(44,2,4,11)  | -168.9 | D(44,2,42,59) | -142.9 | D(9,6,13,17)  | -1.8   | D(14,16,21,24) | -111.0 |
| D(63,1,3,9)  | 156.2  | D(3,1,65,70)  | 68.7   | D(4,2,7,8)    | -6.1   | D(4,2,43,47)  | 15.4   | D(2,7,8,11)   | 3.4    | D(8,25,26,27)  | -179.8 |
| D(63,1,3,12) | -14.6  | D(5,1,65,70)  | -9.7   | D(4,2,7,28)   | -178.5 | D(7,2,43,47)  | 84.4   | D(2,7,8,25)   | -175.4 | D(8,25,26,28)  | 0.1    |
| D(64,1,3,9)  | -104.8 | D(37,1,65,70) | -102.2 | D(38,2,7,8)   | 79.5   | D(38,2,43,47) | -70.8  | D(28,7,8,11)  | 178.2  | D(29,25,26,27) | 0.0    |
| D(64,1,3,12) | 84.5   | D(63,1,65,70) | -142.0 | D(38,2,7,28)  | -92.9  | D(39,2,43,47) | -143.2 | D(28,7,8,25)  | -0.7   | D(29,25,26,28) | 180.0  |
| D(65,1,3,9)  | -98.2  | D(67,1,65,70) | 144.7  | D(39,2,7,8)   | 164.1  | D(40,2,43,47) | -178.7 | D(2,7,28,26)  | 173.5  | D(8,25,29,30)  | -65.3  |
| D(65,1,3,12) | 91.0   | D(68,1,65,70) | -178.6 | D(39,2,7,28)  | -8.2   | D(41,2,43,47) | 144.4  | D(2,7,28,33)  | -6.1   | D(8,25,29,31)  | 175.2  |
| D(66,1,3,9)  | -123.4 | D(3,1,66,83)  | 28.4   | D(40,2,7,8)   | -168.9 | D(4,2,44,48)  | 54.2   | D(8,7,28,26)  | 0.8    | D(8,25,29,32)  | 54.8   |
| D(66,1,3,12) | 65.9   | D(5,1,66,83)  | -50.1  | D(40,2,7,28)  | 18.7   | D(7,2,44,48)  | -113.8 | D(8,7,28,33)  | -178.8 | D(26,25,29,30) | 114.9  |
| D(67,1,3,9)  | -160.2 | D(37,1,66,83) | 126.5  | D(41,2,7,8)   | -132.3 | D(38,2,44,48) | -31.5  | D(7,8,11,4)   | 3.6    | D(26,25,29,31) | -4.6   |
| D(67,1,3,12) | 29.1   | D(63,1,66,83) | 179.5  | D(41,2,7,28)  | 55.3   | D(40,2,44,48) | -144.4 | D(7,8,11,12)  | -177.0 | D(26,25,29,32) | -125.1 |
| D(68,1,3,9)  | 168.9  | D(64,1,66,83) | -145.8 | D(42,2,7,8)   | -99.4  | D(41,2,44,48) | 179.2  | D(25,8,11,4)  | -177.8 | D(25,26,28,7)  | -0.6   |
| D(68,1,3,12) | -1.8   | D(68,1,66,83) | 142.9  | D(42,2,7,28)  | 88.3   | D(42,2,44,48) | 142.8  | D(25,8,11,12) | 1.6    | D(25,26,28,33) | 179.0  |
| D(3,1,5,6)   | 6.1    | D(3,1,67,71)  | -15.4  | D(43,2,7,8)   | -79.8  | D(1,3,9,6)    | 9.3    | D(7,8,25,26)  | 0.3    | D(27,26,28,7)  | 179.4  |
| D(3,1,5,16)  | 178.5  | D(5,1,67,71)  | -84.4  | D(43,2,7,28)  | 107.8  | D(1,3,9,10)   | -171.3 | D(7,8,25,29)  | -179.5 | D(27,26,28,33) | -1.0   |
| D(37,1,5,6)  | -79.5  | D(37,1,67,71) | 70.8   | D(44,2,7,8)   | 162.7  | D(12,3,9,6)   | -179.5 | D(11,8,25,26) | -178.3 | D(7,28,33,34)  | -69.5  |
| D(37,1,5,16) | 92.9   | D(63,1,67,71) | 143.2  | D(44,2,7,28)  | -9.6   | D(12,3,9,10)  | -0.2   | D(11,8,25,29) | 1.8    | D(7,28,33,35)  | 171.1  |
| D(63,1,5,6)  | -164.1 | D(64,1,67,71) | 178.7  | D(4,2,39,49)  | 90.5   | D(1,3,12,11)  | 170.9  | D(3,9,10,4)   | 0.1    | D(7,28,33,36)  | 51.3   |
| D(63,1,5,16) | 8.2    | D(65,1,67,71) | -144.4 | D(7,2,39,49)  | -69.5  | D(9,3,12,11)  | 0.1    | D(6,9,10,4)   | 179.5  | D(26,28,33,34) | 111.0  |
| D(64,1,5,6)  | 168.9  | D(3,1,68,72)  | -54.2  | D(38,2,39,49) | 12.7   | D(2,4,10,9)   | -170.9 | D(4,11,12,3)  | -0.1   | D(26,28,33,35) | -8.4   |
| D(64,1,5,16) | -18.7  | D(5,1,68,72)  | 113.8  | D(41,2,39,49) | -147.7 | D(11,4,10,9)  | -0.1   | D(8,11,12,3)  | -179.5 | D(26,28,33,36) | -128.2 |
| D(65,1,5,6)  | 132.3  | D(37,1,68,72) | 31.5   | D(42,2,39,49) | 176.5  | D(2,4,11,8)   | -9.3   | D(6,13,14,15) | 179.8  | D(44,39,40,41) | 0.7    |

|                |        |                |        |                |        |                |        |                |        |                |        |
|----------------|--------|----------------|--------|----------------|--------|----------------|--------|----------------|--------|----------------|--------|
| D(65,1,5,16)   | -55.3  | D(64,1,68,72)  | 144.4  | D(43,2,39,49)  | 139.7  | D(2,4,11,12)   | 171.3  | D(6,13,14,16)  | -0.1   | D(44,39,40,45) | -176.0 |
| D(66,1,5,6)    | 99.4   | D(65,1,68,72)  | -179.2 | D(4,2,40,45)   | -120.2 | D(10,4,11,8)   | 179.5  | D(17,13,14,15) | 0.0    | D(49,39,40,41) | 179.8  |
| D(66,1,5,16)   | -88.3  | D(66,1,68,72)  | -142.8 | D(7,2,40,45)   | -28.4  | D(10,4,11,12)  | 0.2    | D(17,13,14,16) | -180.0 | D(49,39,40,45) | 3.1    |
| D(67,1,5,6)    | 79.8   | D(7,2,4,10)    | 179.3  | D(38,2,40,45)  | 61.7   | D(1,5,6,9)     | -3.4   | D(6,13,17,18)  | -54.8  | D(40,39,44,43) | -3.1   |
| D(67,1,5,16)   | -107.8 | D(7,2,4,11)    | 8.5    | D(42,2,40,45)  | -140.5 | D(1,5,6,13)    | 175.4  | D(6,13,17,19)  | -175.2 | D(40,39,44,48) | 174.3  |
| D(68,1,5,6)    | -162.7 | D(38,2,4,10)   | 93.8   | D(43,2,40,45)  | -177.9 | D(16,5,6,9)    | -178.2 | D(6,13,17,20)  | 65.3   | D(49,39,44,43) | 177.8  |
| D(68,1,5,16)   | 9.6    | D(38,2,4,11)   | -77.0  | D(44,2,40,45)  | 145.3  | D(16,5,6,13)   | 0.7    | D(14,13,17,18) | 125.1  | D(49,39,44,48) | -4.8   |
| D(3,1,63,73)   | -90.5  | D(39,2,4,10)   | 14.6   | D(4,2,41,46)   | -68.7  | D(1,5,16,14)   | -173.5 | D(14,13,17,19) | 4.6    | D(2,39,49,50)  | -48.1  |
| D(5,1,63,73)   | 69.5   | D(39,2,4,11)   | -156.2 | D(7,2,41,46)   | 9.7    | D(1,5,16,21)   | 6.1    | D(14,13,17,20) | -114.9 | D(2,39,49,51)  | 70.2   |
| D(37,1,63,73)  | -12.7  | D(40,2,4,10)   | -84.5  | D(38,2,41,46)  | 102.2  | D(6,5,16,14)   | -0.8   | D(13,14,16,5)  | 0.6    | D(2,39,49,55)  | -164.5 |
| D(65,1,63,73)  | 147.7  | D(40,2,4,11)   | 104.8  | D(39,2,41,46)  | 142.0  | D(6,5,16,21)   | 178.8  | D(13,14,16,21) | -179.0 | D(40,39,49,50) | -142.1 |
| D(66,1,63,73)  | -176.5 | D(41,2,4,10)   | -91.0  | D(43,2,41,46)  | -144.7 | D(5,6,9,3)     | -3.6   | D(15,14,16,5)  | -179.4 | D(40,39,49,51) | -23.8  |
| D(67,1,63,73)  | -139.7 | D(41,2,4,11)   | 98.2   | D(44,2,41,46)  | 178.6  | D(5,6,9,10)    | 177.0  | D(15,14,16,21) | 1.0    | D(40,39,49,55) | 101.5  |
| D(3,1,64,69)   | 120.2  | D(42,2,4,10)   | -65.9  | D(4,2,42,59)   | -28.4  | D(13,6,9,3)    | 177.8  | D(5,16,21,22)  | -51.3  | D(44,39,49,50) | 36.9   |
| D(5,1,64,69)   | 28.4   | D(42,2,4,11)   | 123.4  | D(7,2,42,59)   | 50.1   | D(13,6,9,10)   | -1.6   | D(5,16,21,23)  | -171.1 | D(44,39,49,51) | 155.3  |
| D(44,39,49,55) | -79.4  | D(50,49,55,58) | 179.7  | D(67,66,83,85) | -82.8  | D(47,43,44,39) | 176.4  | D(69,64,65,70) | -0.1   | D(55,49,51,52) | -58.5  |
| D(39,40,41,42) | 3.5    | D(51,49,55,56) | -177.4 | D(67,66,83,86) | 36.6   | D(47,43,44,48) | -1.0   | D(64,65,66,67) | 5.0    | D(55,49,51,53) | 60.1   |
| D(39,40,41,46) | -176.6 | D(51,49,55,57) | -57.6  | D(66,67,68,63) | -1.4   | D(39,49,51,52) | 65.4   | D(64,65,66,83) | -176.8 | D(55,49,51,54) | 178.8  |
| D(45,40,41,42) | -179.8 | D(51,49,55,58) | 61.7   | D(66,67,68,72) | 176.0  | D(39,49,51,53) | -176.0 | D(70,65,66,67) | -175.1 | D(39,49,55,56) | 55.5   |
| D(45,40,41,46) | 0.1    | D(68,63,64,65) | -0.7   | D(71,67,68,63) | -176.4 | D(39,49,51,54) | -57.3  | D(70,65,66,83) | 3.1    | D(39,49,55,57) | 175.3  |
| D(40,41,42,43) | -5.0   | D(68,63,64,69) | 176.0  | D(71,67,68,72) | 1.0    | D(50,49,51,52) | -177.0 | D(65,66,67,68) | -2.6   | D(39,49,55,58) | -65.4  |
| D(40,41,42,59) | 176.8  | D(73,63,64,65) | -179.8 | D(63,73,75,76) | 65.4   | D(50,49,51,53) | -58.4  | D(65,66,67,71) | 172.4  | D(50,49,55,56) | -59.4  |
| D(46,41,42,43) | 175.1  | D(73,63,64,69) | -3.1   | D(63,73,75,77) | -175.3 | D(50,49,51,54) | 60.3   | D(83,66,67,68) | 179.2  | D(50,49,55,57) | 60.4   |
| D(46,41,42,59) | -3.1   | D(64,63,68,67) | 3.1    | D(42,43,44,39) | 1.4    | D(63,73,75,78) | -55.5  | D(63,73,79,81) | 176.0  | D(83,66,67,71) | -5.8   |
| D(41,42,43,44) | 2.6    | D(64,63,68,72) | -174.3 | D(42,43,44,48) | -176.0 | D(74,73,75,76) | -179.7 | D(63,73,79,82) | -65.4  | D(1,66,83,84)  | 70.0   |
| D(41,42,43,47) | -172.4 | D(73,63,68,67) | -177.8 | D(68,63,73,74) | -36.9  | D(74,73,75,77) | -60.4  | D(74,73,79,80) | -60.3  | D(1,66,83,85)  | -170.4 |
| D(59,42,43,44) | -179.2 | D(73,63,68,72) | 4.8    | D(68,63,73,75) | 79.4   | D(74,73,75,78) | 59.4   | D(74,73,79,81) | 58.4   | D(1,66,83,86)  | -51.1  |
| D(59,42,43,47) | 5.8    | D(1,63,73,74)  | 48.1   | D(68,63,73,79) | -155.3 | D(79,73,75,76) | -61.7  | D(74,73,79,82) | 177.0  | D(65,66,83,84) | -20.4  |
| D(2,42,59,60)  | -70.0  | D(1,63,73,75)  | 164.5  | D(63,64,65,66) | -3.5   | D(79,73,75,77) | 57.6   | D(75,73,79,80) | -178.8 | D(65,66,83,85) | 99.2   |

|                |       |                |        |                |        |                |       |                |       |                |        |
|----------------|-------|----------------|--------|----------------|--------|----------------|-------|----------------|-------|----------------|--------|
| D(2,42,59,61)  | 51.1  | D(1,63,73,79)  | -70.2  | D(63,64,65,70) | 176.6  | D(79,73,75,78) | 177.4 | D(75,73,79,81) | -60.1 | D(65,66,83,86) | -141.5 |
| D(2,42,59,62)  | 170.4 | D(64,63,73,74) | 142.1  | D(69,64,65,66) | 179.8  | D(63,73,79,80) | 57.3  | D(75,73,79,82) | 58.5  | D(67,66,83,84) | 157.6  |
| D(41,42,59,60) | 20.4  | D(64,63,73,75) | -101.5 | D(41,42,59,62) | -99.2  | D(43,42,59,61) | -36.6 |                |       |                |        |
| D(41,42,59,61) | 141.5 | D(64,63,73,79) | 23.8   | D(43,42,59,60) | -157.6 | D(43,42,59,62) | 82.8  |                |       |                |        |

\* For the atomic indices refer to Figure S1

**Table S14.** TD-DFT calculated electronic transitions for  $[1]^+$ ,  $[1]^{2+}$ , and  $[1]$ .

| State      | $\lambda/\text{nm}$<br>(Expt.) | $\lambda/\text{nm}$<br>(DFT) | Oscillator<br>Strength ( <i>f</i> ) | Transition*                                                                                                                                    | Character                                                                                                                                                                                                                                                                                                                |
|------------|--------------------------------|------------------------------|-------------------------------------|------------------------------------------------------------------------------------------------------------------------------------------------|--------------------------------------------------------------------------------------------------------------------------------------------------------------------------------------------------------------------------------------------------------------------------------------------------------------------------|
| $[1]^+$    | 491                            | 466                          | 0.037                               | 176 $\alpha$ $\rightarrow$ 180 $\alpha$ (-0.3)<br>175 $\beta$ $\rightarrow$ 178 $\beta$ (0.63)<br>176 $\beta$ $\rightarrow$ 180 $\beta$ (-0.3) | Ru(d $\pi$ )/ <i>p</i> -cym( $\pi$ )/Cl(p $\pi$ ) $\rightarrow$ Ru(d $\pi$ )/ <i>p</i> -cym( $\pi^*$ )/Ru-Cl( $\sigma^*$ )<br>Ru(d $\pi$ )/bpytz( $\pi$ )/Cl(p $\pi$ ) $\rightarrow$ bpytz( $\pi^*$ )                                                                                                                    |
|            | 491                            | 502                          | 0.042                               | 175 $\beta$ $\rightarrow$ 178 $\beta$ (0.5)<br>177 $\beta$ $\rightarrow$ 178 $\beta$ (0.5)                                                     | Ru(d $\pi$ )/ <i>p</i> -cym( $\pi$ )/Cl(p $\pi$ ) $\rightarrow$ Ru(d $\pi$ )/ <i>p</i> -cym( $\pi^*$ )/Ru-Cl( $\sigma^*$ )<br>Ru(d $\pi$ )/bpytz( $\pi$ )/Cl(p $\pi$ ) $\rightarrow$ bpytz( $\pi^*$ )<br>Ru(d $\pi$ )/ <i>p</i> -cym( $\pi$ )/Cl(p $\pi$ ) $\rightarrow$ bpytz( $\pi^*$ )                                |
| $[1]^{2+}$ | n.o.                           | 501                          | 0.021                               | 169 $\rightarrow$ 178(-0.3)<br>171 $\rightarrow$ 178(0.6)                                                                                      | Ru(d $\pi$ )/bpytz( $\pi$ )/Cl(p $\pi$ ) $\rightarrow$ Ru(d $\pi$ )/bpytz( $\pi^*$ )<br>Cl(p $\pi$ )/bpytz( $\pi$ ) $\rightarrow$ Ru(d $\pi$ )/bpytz( $\pi^*$ )                                                                                                                                                          |
|            | n.o.                           | 600                          | 0.042                               | 173 $\rightarrow$ 178(0.7)                                                                                                                     | <i>p</i> -cym( $\pi$ )/Cl(p $\pi$ ) $\rightarrow$ Ru(d $\pi$ )/bpytz( $\pi^*$ )                                                                                                                                                                                                                                          |
|            | 716                            | 752                          | 0.170                               | 175 $\rightarrow$ 178(0.6)<br>177 $\rightarrow$ 178(-0.3)                                                                                      | Ru(d $\pi$ )/bpytz( $\pi$ )/Cl(p $\pi$ ) $\rightarrow$ Ru(d $\pi$ )/bpytz( $\pi^*$ )<br>( <i>p</i> -cym( $\pi$ )/Cl(p $\pi$ )/bpytz( $\pi$ ) $\rightarrow$ (Ru(d $\pi$ )/bpytz( $\pi^*$ ))                                                                                                                               |
| $[1]$      | 450                            | 473                          | 0.030                               | 176 $\rightarrow$ 180(-0.4)<br>177 $\rightarrow$ 179(0.4)                                                                                      | Ru(d $\pi$ )/bpytz( $\pi$ )/ <i>p</i> -cym( $\pi$ )/Cl(p $\pi$ ) $\rightarrow$ Ru(d $\pi$ )/bpytz( $\pi^*$ )/ <i>p</i> -cym( $\pi^*$ )/Ru-Cl( $\sigma^*$ )<br>Ru(d $\pi$ )/bpytz( $\pi$ )/ <i>p</i> -cym( $\pi$ )/Cl(p $\pi$ ) $\rightarrow$ Ru(d $\pi$ )/bpytz( $\pi^*$ )/ <i>p</i> -cym( $\pi^*$ )/Ru-Cl( $\sigma^*$ ) |
|            | 450                            | 500                          |                                     |                                                                                                                                                |                                                                                                                                                                                                                                                                                                                          |
|            | n.o.                           | 652                          | 0.067                               | 178 $\rightarrow$ 184(0.7)                                                                                                                     | bpytz( $\pi$ )/ <i>p</i> -cym( $\pi$ ) $\rightarrow$ bpytz( $\pi^*$ )/ <i>p</i> -cym( $\pi^*$ )                                                                                                                                                                                                                          |
|            | n.o.                           | 653                          | 0.148                               | 178 $\rightarrow$ 181(0.6)<br>178 $\rightarrow$ 182(-0.3)                                                                                      | bpytz( $\pi$ )/ <i>p</i> -cym( $\pi$ ) $\rightarrow$ bpytz( $\pi^*$ )/ <i>p</i> -cym( $\pi^*$ )/Ru(d $\pi$ )<br>bpytz( $\pi$ )/ <i>p</i> -cym( $\pi$ ) $\rightarrow$ bpytz( $\pi^*$ )/ <i>p</i> -cym( $\pi^*$ )/Ru(d $\pi$ )                                                                                             |
|            |                                |                              | 0.037                               | 178 $\rightarrow$ 181(0.3)<br>178 $\rightarrow$ 182(0.6)                                                                                       | bpytz( $\pi$ )/ <i>p</i> -cym( $\pi$ ) $\rightarrow$ bpytz( $\pi^*$ )/ <i>p</i> -cym( $\pi^*$ )/Ru(d $\pi$ )<br>bpytz( $\pi$ )/ <i>p</i> -cym( $\pi$ ) $\rightarrow$ bpytz( $\pi^*$ )/ <i>p</i> -cym( $\pi^*$ )/Ru(d $\pi$ )                                                                                             |

\*HOMO of  $[1]^+$ ,  $[1]^{2+}$ , $[1]$  are 178 $\alpha$ , 177, 178 respectively. Here, “n.o.” indicates that the band was not observed.

**Fig. S4** Experimental and theoretical UV-vis-NIR spectra of the native [1]<sup>+</sup>, oxidised [1]<sup>2+</sup> and reduced [1] species.

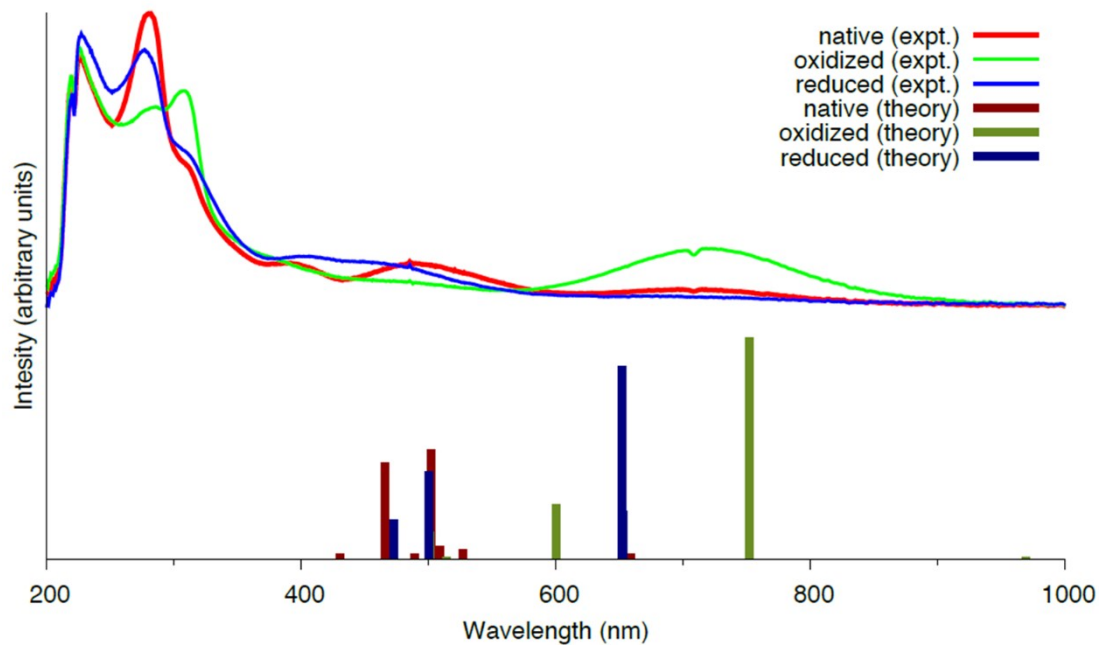

Supplement: c6dt01995a1.pdf [file c6dt01995a1.pdf]
